# Supplementary material for: Nitric Oxide regulates mouth development in amphioxus
Source: PubMed Central journal article supplement (PMC5559612; doi:10.1038/s41598-017-08157-w), 2017-08-16
Supplement: 41598_2017_8157_MOESM1_ESM.pdf [file 41598_2017_8157_MOESM1_ESM.pdf]

## **Nitric Oxide regulates mouth development in amphioxus**

Giovanni Annona<sup>1</sup>, Filomena Caccavale<sup>1</sup>, Juan Pascual-Anaya<sup>2</sup>,  
Shigeru Kuratani<sup>2</sup>, Pasquale De Luca<sup>3</sup>, Anna Palumbo<sup>1</sup>, Salvatore D'Aniello<sup>1,\*</sup>

<sup>1</sup> Biology and Evolution of Marine Organisms, Stazione Zoologica Anton Dohrn di Napoli,  
Villa Comunale 1, 80121, Napoli, Italy

<sup>2</sup> Evolutionary Morphology Laboratory, RIKEN, Minatojima-minami 2-2-3, 650-0047 Kobe,  
Hyogo, Japan

<sup>3</sup> RIMAR, Stazione Zoologica Anton Dohrn di Napoli, Villa Comunale 1, 80121, Napoli,  
Italy

\* **Corresponding Author:** Salvatore D'Aniello < [salvatore.daniello@szn.it](mailto:salvatore.daniello@szn.it) >

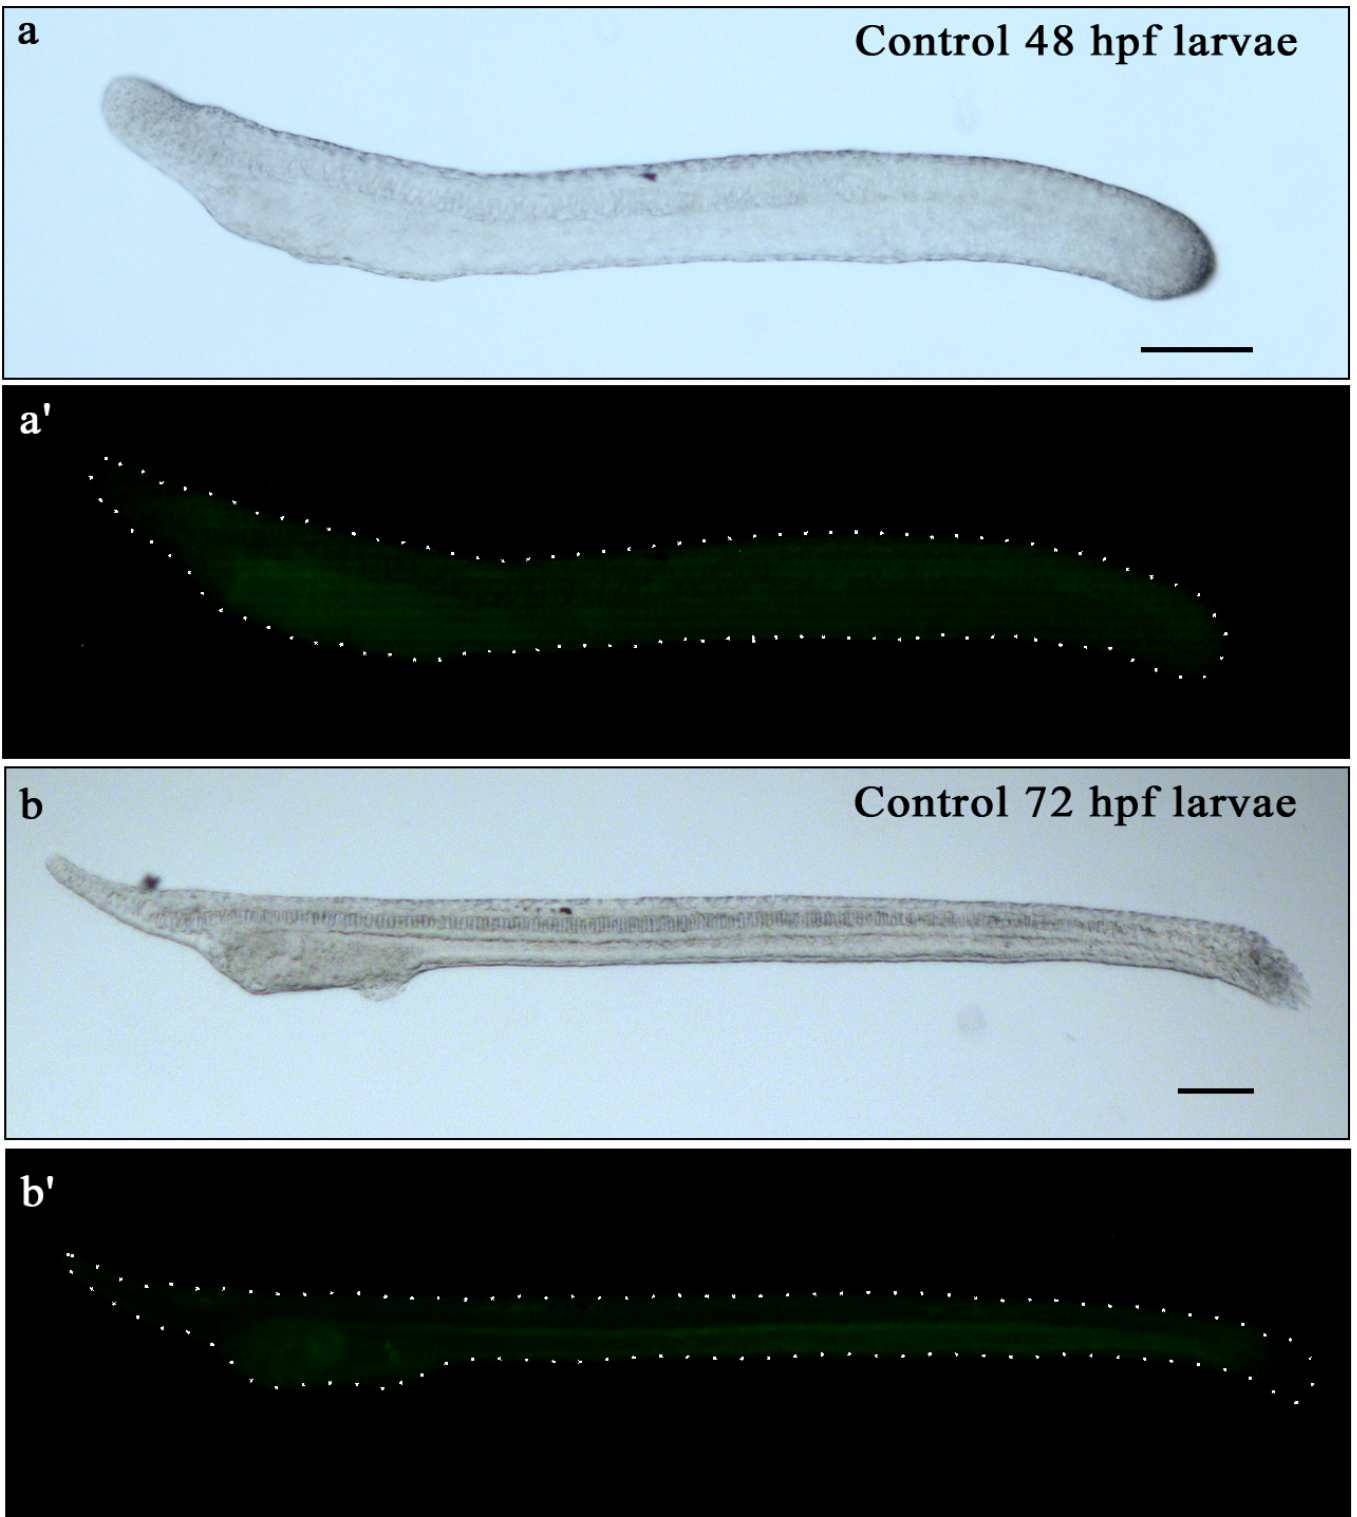

**Supplementary Figure S1:**

Endogenous green fluorescence emission in not treated *B. lanceolatum* larvae (negative control), showing a negligible non-specific signal at the same laser intensity as used for DAF-FM-DA experiments. a) pre-mouth larvae (48 hpf) in bright field, a') the same specimen in fluorescence. b) 72 hpf larvae in bright field, b') the same specimen in fluorescence. Rostral part is on the left, dorsal part on the top. Scale bars: 50  $\mu\text{m}$ .

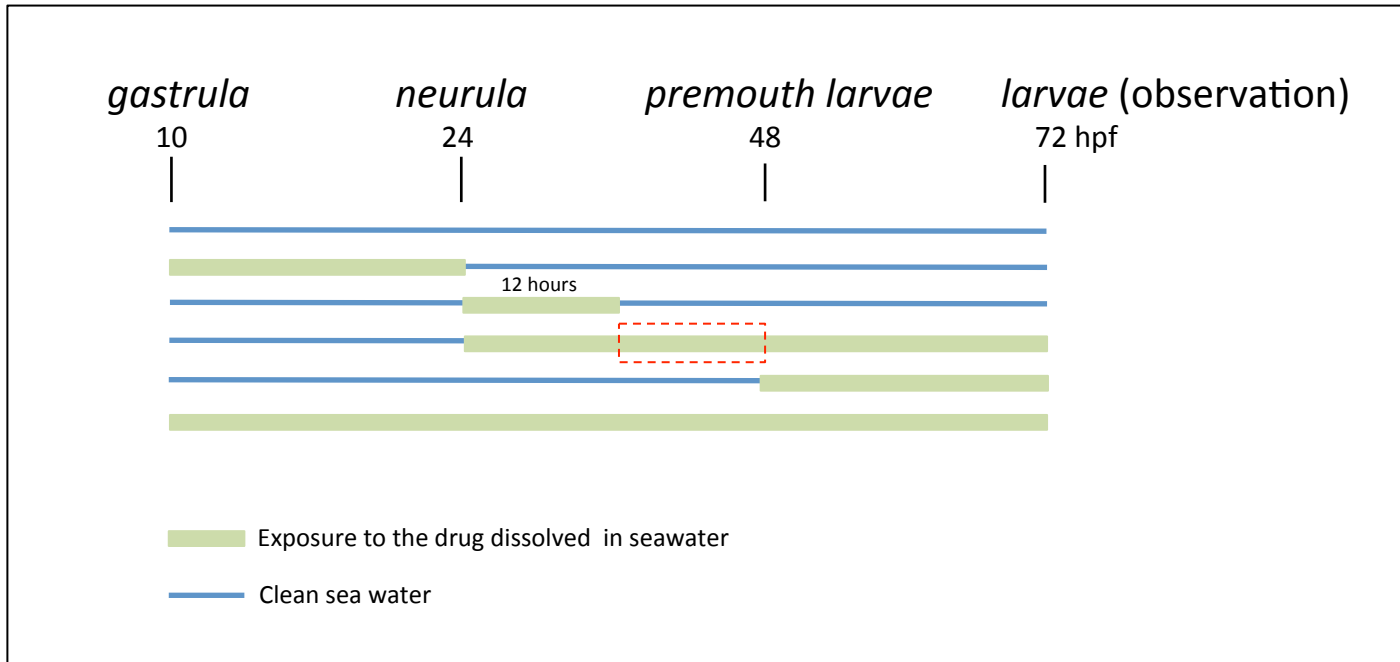

**Supplementary Figure S2: Scheme of drug treatments**

The drug incubation period, from gastrula to larvae, is schematized by green bars, while blue thin bars indicate that the embryos are in FSW. Several washes with sea water were performed to end treatments. All samples were observed at 72 hpf for the general morphology (body plan shape, length) and in particular for the pharyngeal area development.

### Supplementary Figure S3

Protein and coding sequences (CDS) of the *B. lanceolatum* Nos genes, extracted from the draft genome sequence. See Materials and Methods for details.

#### >*B. lanceolatum* NOSA, protein

MEGQQNIIVVGLVKREVDGLGVSAKRREVPGHSAVVIEEVIRGGPADHTGMVQPGDTIVAVN  
GQDIEGLSYQEATKVIRDIEPGKPVLELVLVRGPKWFHTYLETVRLSTGETKTVRVTRPNPPIG  
ALTLIIQMRGNTFDKRAIRKLENRGDIPLYNRGVLMNGDVIKPIPNGTVSNGCPVTGHRAA  
TVGPSRTRRPVRLKNWLNERRINDNLHSKANDLNPCNDGRCLGPLMRPRPFTAPGYFRPKEE  
VLEQAKKFIFEYYASLKSSDAGERDRRWRDVQVQVEEKGVYHLTYDELLYGAKMSWRNAPRC  
IGRIQWSKLLQFDARDVTTARGMFEAICRHIKWCTNGGNIRSAITVFPPRTDGRHDYKVNWG  
QFLKYAAYQLPDGSI LGDPINLEFTVEVCQALGWKGEETRFDLLPMVLSANGEDPEWFDLPKD  
IVMEVNITHPKYDWFEELGIKWYCVPAVSNMLFDCGGLEFSAAPFSGWYMGTEVGRDLCDEN  
RLNITEAVGKRMGLDVARNSSLWKDAVFVEVNI AVLHSFQRNNATIMDHHTASETFMKHLEN  
EQRLRGGCPSDWVWIVPPMSASLTEVFHQEMANYHVRPSFEYQEDAWLLHLWRKKPEHPVLL  
KYAYDENPKRKYRLKEVALAVKFAAVLMKKALNKRKVTI LYATETGKSESFASSTLTIFKH  
AFDAKMMCMDEYDITNLEKEELVIVVTSTFGNGDPPDNGEAFGQALLHMRHPPGSDKKRSGS  
VRRVSSISKASYRRQQKLLRQLRDGGALGKVRYGVFALGSRAYPHFCAFGHAIDTLFESLGA  
ERIHVPVGEDEL CGQEESFRVWVKGAFKSACERYDVGHYVNMEEANASLLGSDFSWAPGKFR  
VLQTKGLPETDILEGLSKLHRRTVVSSTVISRTOQLQAPESSRQTCVQLETHGAQELRYVPG  
DHVAVFPANEDRLVQAILDRVEKGTNPDAVIQIEALQEKKIGAGLVKSWTPHDRLPTCSLRT  
ALSRYLDVTT PPSQQLLYLAMHATSSRERAELEALGKGGRLYEDWKFEAAPTLPEVLQHYP  
SLQVPPALLLSQLPVLQQRYYSSISSPHMYPGQIHATVAVVKYRTRGGQGPEHSGVCSNWLN  
TIKSNESVPCFIRTAKNFHLPENSSLPVL MVGPGTGIAPLRSFWQQRQVDIKAGTTSRHPPG  
DMTLVFGCRQSRVDHIYKEETAQARRDGALTDLYIALSREP GTTKTYVQDIIRQQIPKKVLD  
LVLKDGGHYVCGDVTMATDVGETVQRILVEHGGMSVARAEDFINNMKDNRYHEDI FGVTL  
KTHEVEDAARKRSPSFISLSEENTSL

#### >*B. lanceolatum* NosA, CDS

ATGGAGGGACAACAGAACATCATCGTCGTCGGACTGGTCAAGAGGGAGGTTGATGGACTGGG  
AGTATCGGGCGAAGCGACGGGAAGTACCCGGTCATTCTGCGGTGGTCATCGAGGAGGTGATCC  
GAGGCGGGCCTGCTGACCACACCGGGATGGTGCAGCCAGGGGACACCATCGTCGCTGTAAAC  
GGGCAGGACATCGAGGGGTTGTCTGACCAGGAGGCGACCAAGGTCATCAGGGACATCGAGCC  
GGGAAGCCGGTTCGAGCTCGTCCTCCGCGGACCGAAGTGGTTCACACCTACCTGGAGACCG  
TCCGTCTGAGCACC GGGGAGACCAAACCGTGCGAGTCACCCGGCCTAACGGGCCCATCGGC  
GCCCTGACACTCCTCATAACAGCGCATGAGAGGAAACACTTTTGACAAGAGAGCCATACGTAA  
ACTTGAGAATCGCGGCGACATCCCGCTCTACAATCGCGGCGTACTGATGAACGGTGATGTCA  
TCAAGCCCATCCCGAACGGTACCGTATCGAACGGCTGTCCGGTCACTGGGCACAGGGCAGCC  
ACGGTGGGACCGTCCAGGACCAGGAGGCCAGTGCGACTGAAGAACTGGCTGAACGAAAGGAG  
AATCAATGACAACCTCCACTCGAAGGCAAACGACTTGAACCCGTGCAATGACGGCAGATGTC  
TCGGTCCGCTGATGCGACCACGACCGTTCACAGCACCCGGCTACTTCCGGCCGAAGGAAGAA  
GTCCTCGAACAAGCAAAGAAGTTCATCTTCGAGTACTACGCTTCCTTGAAGAGTTCGGATGC  
TGGTGAGCGTGACAGACGTTGAGAGACGTCCAGGTGCAGGTGGAGGAGAAAGGTGTGTACC  
ACCTGACGTACGACGAGCTGTTGTACGGCGCCAAGATGTCGTGGAGGAATGCGCCAAGATGC  
ATCGGACGTATCCAGTGGTCCAAACTGCAGCTGTTTGACGCCCGTGACGTCACAACGGCCAG  
AGGAATGTTTGAGGCTATCTGCCGACACATCAAATGGTGCACCAACGGCGGGAATATCAGGT  
CTGCCATTACTGTTTTCCCGCCACGCACGGACGGTCCCATGACTACAAGGTGTGGAACGGA  
CAGTTCCTGAAATATGCCGCCTACCAGCTGCCTGACGGTCCATCCTCGGCGATCCCATCAA  
CCTAGAATTACAGAGGTATGCCAGGCTCTGGGCTGGAAGGGGGAGGGCACACGGTTCGACC

TGCTGCCCATGGTTCTGTCTGCTAACGGGGAGGACCCGGAGTGGTTCGACCTCCCGAAGGAC  
ATCGTGATGGAGGTCAACATCACACATCCCAAGTACGACTGGTTTGAAGAGTTGGGCATCAA  
GTGGTACTGTGTCCCTGCCGTGTCCAACATGTTGTTTACTGCGGCGGTCTGGAGTTTTTCAG  
CGGCTCCCTTCAGCGGCTGGTACATGGGGACGGAGGTGGGCAGGGACCTGTGTGACGAGAAC  
AGGCTCAACATCACAGAAGCAGTAGGAAAGAGGATGGGTCTGGACGTGCAAGAAACTCCTC  
CCTCTGGAAAGACGCCGTTTTTCGTGGAGGTCAACATCGCCGTCTTGATAGCTTCCAGCGCA  
ACAACGCCACGATTATGGATCACCACACGGCTTCGGAGACCTTCATGAAACACCTGGAGAAC  
GAACAGCGCCTGCGCGGGGGATGCCCTTCTGATTGGGTGTGGATCGTGCCCCAATGTTCGGC  
GTCTCTCACCGAGTTTTTCCATCAAGAGATGGCGAACTACCATGTGAGGCCGTCTTTCGAAT  
ATCAGGAGGACGCCTGGCTGCTTACCTCTGGAGAAAGAAGCCGGAGCACCCAGTCTTCTG  
AAGTACGCCTACGATGAAAACCCAAAAGGAAGTACCGTCTGAAGGAGGTGGCTCTGGCGGT  
AAAGTTCGCTGCCGTGCTGATGAAGAAAGCTCTCAACAAGCGAGTAAAGACCACCATCCTGT  
ACGCCACAGAAACCGGCAAGTCGGAATCATTCGCATCTTCTACACTCACGATCTTCAAACAC  
GCGTTTTGACGCAAAGATGATGTGTATGGATGAGTACGACATAACAAACCTGGAGAAGGAGGA  
ACTCGTCATCGTCGTCACCAGTACCTTTCGGGAACGGAGACCCGCCGGACAACGGAGAGGCTT  
TTGGTTCAGGCTTTACTCCACATGAGGCATCCACCTGGAAGTGATAAAAAGAGATCCGGCAGT  
GTCCGGAGGGTGAGCAGCATCTCCAAGGCCCTCTACCGACGTCAGCAGAAACTGCTGCGGCA  
GCTCCGGGACGGCGGGGCGCTCGGCCAAAGTCAGATACGGTGTGTTTGCCCTCGGGTCCCGCG  
CCTATCCACACTTCTGCGCCTTCGGCCACGCCATCGACACGCTGTTTGGAGTCGCTGGGAGCG  
GAACGGATCCATCCTGTGGGTGAAGGAGACGAGCTGTGTGGACAGGAGGAGTCTTCCGGGT  
CTGGGTCAAGGGCGCCTTTAAGTCTGCATGTGAGAGGTACGATGTCGGCCATTACGTGAACA  
TGGAGGAGGCGAACCGCTCCCTTCTCGGGAGTGACTTCAGCTGGGCGCCGGGGAAAGTTCCGT  
GTCCTACAGACCAAGGGACTGCCGGAGACAGACATCCTGGAGGGTCTGTCCAAACTGCATCG  
CAGAACAGTTGTGTCCAGTACAGTCATCTCCAGAACTCAGCTACAAGCTCCGGAGTCCAGCC  
GACAGACCTGCCTGGTGCAGTTGGAAACTCACGGGGCCAGGAGCTGAGGTATGTTCCCGGG  
GATCACGTGGCCGTCTTCCCAGCCAATGAGGACCGACTAGTGCAGGCGATTCTGGACAGAGT  
GGAGAAGGGAAACAAACCCCGACGCCGTCATTCAGATAGAAGCGCTGCAAGAGAAAAAATTG  
GAGCTGGTTTTGGTCAAATCATGGACGCCCCACGACCGACTGCCGACATGTTCTTTGCGCACG  
GCACTATCCCGTTATCTTGACGTCAACACCCACCGTCAACACAGCTGCTCCTCTACCTGGC  
GATGCACGCGACGTCAAGCAGGGAGAGAGCTGAACTCGAGGCTTTGGGCAAGGGAGGACTGA  
GGTACGAGGACTGGAAGTTTGAGGCGGCCCGACTCTGCCCGAGGTGCTGCAGCACTACCCG  
TCCCTGCAGGTCCCGCCCGCCCTGCTGCTCAGTCAGCTGCCGGTCTGCAGCAGCGCTACTA  
CTCCATCAGCTCCTCCCCACACATGTACCCGGGCCAGATCCACGCTACTGTAGCCGTGGTCA  
AGTACAGGACGCGTGGTGGCCAGGGTCTGAGCACAGCGGTGTGTGTTCTAACTGGCTCAAC  
ACCATCAAGAGCAACGAGTCCGTGCCTTGCTTCATTCGCACGGCCAAGAATTTCCACCTTCC  
TGAGAACTCCTCCCTCCCTGTCCTGATGGTAGGTCCCGGGACTGGCATCGCCCCCTCTCAGGA  
GCTTCTGGCAGCAGAGACAGGTGGACATCAAGGCTGGTACCACGTCCAGACATCCTCCAGGT  
GACATGACCCTGGTGTTCGGCTGCAGACAGTCCAGGGTGGACCACATCTACAAGGAGGAGAC  
GGCGCAGGCAAGGAGAGACGGAGCCCTGACAGACCTCTACATAGCACTGTCCAGGGAACCTG  
GGACAATAAGACCTACGTCCAAGACATCATACTCAGCAAATTTCCAAGAAGGTGCTGGAC  
CTGGTTCTGAAAGATGGCGGACACATCTACGTGTGTGGTGACGTCACCATGGCCACTGACGT  
CGGCGAGACCGTTCAGCGAATCCTGGTGGAGCACGGCGGGATGTCTGTGCCAGGGCAGAGG  
ACTTCATCAACAACATGAAGGACAACAACCGTTACCACGAGGACATCTTCGGTGTGACACTG  
AAGACACACGAGGTTGAGGATGCAGCTCGCAAGAGAAGTCCGTCTTTCATCAGTCTTTCGGA  
AGAGAACACTTCTTTGTGA

>*B. lanceolatum* NOSB, protein

MPPVQSRETNGTNPVTPNGCPFTGSTSTAPRRAQILTDHLRNKHLTDTLHLKATNVAPCSS  
GKCMGSVVRQREPFPPGYKRPKEEVLEQAKEFIDDDYASMKKENS AEHERRWIDIQAQVEEK  
GLYDLEYDELLYGAKMAWRNASRCIGRYQWNNLQVIDYRNVKTAQEMFDAACDHIRYATKDG  
QMKTAISIFPMRTDGKHDKYKFNKYLFQYAGYQQPDG SVIGDPANVELTEVCQSLGWKKGKT  
PYDFLPAIVSANGEDPVI FEWPEDEVPLELELRHPKHDWFEELAIKVNCVPLQGDMLFDVGGM  
QFPACPITGWFAQSTEPVRDLLDENRYNMAEIIAKKLG YDTSRYNSLWKDAAFLEVHIAVIHS  
FQMKGVMTQDPYTLTESFMKHMEREHRV RGGCPSDWVWIVPPSCSSLT PVFVHQEMLNYHLRP  
ALEYQEAGWKIHTWKTPPTAPIFTQYIRTKKRC SFKAAAMAVMFASGLMRKTLNKRVKSTIL  
FASQTGKAETFSNSLCDLYKHAFDAKV VCMDEYDMAQLDKEQLVVI VTSTFGNGDPPDNGET  
FARALMQMKNQNGQASPRDSPLSSVRF AVFALGSRAYPHFCAF GHSVDTLLEQLGARRVHAV  
GEGDEL CGQEE SFRAWAESAFKSACL SYDVGHGVDMNEATANLLGSDL SWAPDKFRLVQAKT  
KTDTDILQGLSTVHRKNIVPCTFISRTQLQAPDSSRQTILVRLDTKDNEELEFTPGDHLGVF  
PANEDHLVQAILDRIEGGTPDDVLEIEALHKKLTAAVVTKTWMPFERLP PCSLRTALSRYL  
DITTPPSPQLLGSLSMHTSAPSERAELEELAKGGTKYENWKFERAPTLPEVLQ EYPSLQVPP  
ALLLSQLPVLQQRYSISSSPHMYPGEIHATLAVVS YRSQGGKGPVHNGVCSSWFNRL EEGE  
TVPCFVRAAKNFHLPADPSMPVLMVGP GTGIAPLRSFWQQRQMDIKSGNHGDMTLVFGCRQS  
QIDHIYKDETAQAKTDGALTDIYTAYSREP DTPKTYVQHVLYNQLSERVKELLKNNGHIYVC  
GDVAMADDVCTTVQKILEEK SAMTSTESEALIRMLKDSNRYHEDIFGVTLNTKEVREARSV  
ESAESNAK

**>B. lanceolatum NosB, CDS**

ATGCCACCGGTACAATCCAGAGAAACGAACGGCACCAATCCTAATGTCACCCCGAACGGGTG  
TCCCTTTACGGGGTCTACCAGCACAGCTCCGCGGAGAGCCAGATTCTGACAGACCACCTGC  
GGAACAAGCACTTGACCGATACTTTACACCTGAAGGCAACCAATGTAGCCCTTGCAGTTCA  
GAAAATGCATGGGCTCGGTGGTTTCGGCAGAGAGAGCCTTTTCCCCGGGTTACAAGAGGCC  
GAAGGAAGAAGTGCTGGAACAGGCGAAGGAATTTATCGACGACTACTACGCTTCGATGAAAA  
AGGAAAACAGTGCAGAACATGAGAGGCGGTGGATTGACATACAAGCCCAGGTGCAAGAGAAA  
GGTTTGTACGACTTGAGTACGATGAGCTTCTGTATGGCGCCAAAATGGCCTGGCGGAACGC  
ATCCAGATGTATCGGACGGTACCAATGGAACAACCTTACAAGTGATTGACTATCGCAACGTCA  
AGACGGCCCAAGAAATGTTTGACCGCCCTGCGATCATATTAGGTACGCCACCAAGGATGGG  
CAGATGAAGACCGCCATCAGCATTTCCTCAATGCGCACAGATGGAAAACACGACTACAAGTT  
CTGGAATAAGTACCTGTTCCAGTACGCTGGGTACCAGCAGCCTGACGGTTCAGTCATTGGAG  
ATCCCGCCAACGTGGAACCTTACCAGGTTGTGCCAAAGTCTCGGCTGGAAGGGCAAAGGAACT  
CCATATGATTTTCTACCCGCCATTGTCTCTGCTAATGGCGAGGACCCGGTCATCTTCGAATG  
GCCAGAAGACGTACCCCTGGAACCTGGAACCTGCGGCATCCAAAGCACGACTGGTTCGAAGAGC  
TGGCCATAAAGGTGAACTGCGTACCGCTGCAAGGAGACATGCTATTCGACGTTGGCGGGATG  
CAGTTTCTGCTGTCCAATCACAGGCTGGTTTCAGAGCACGGAGCCTGTGCGGATCTGTT  
GGACGAAAACAGATAACAATGGCAGAGATCATCGCCAAGAAGTTGGGATATGACACTTCCC  
GGTACAACCTCGCTGTGGAAGGATGCTGCCTTCTGGAGGTTACATTGCAGTTATACACTCT  
TTTCAGATGAAGGGAGTGATGACCCAGGATCCGTACACCCTGACCGAGAGCTTCATGAAGCA  
CATGGAGAGGGAACACCGTGTCCGCGGCGGGTGTCCGTCCGACTGGGTCTGGATCGTTCCTC  
CCTCCTGCTCCTCTCTCACTCCCGTCTTCCACCAGGAGATGCTGAACTACCACCTCAGGCCC  
GCTCTGGAGTACCAGGAGGCGGGATGGAAGATACATACATGGAAGACTCCTCCGACTGCCCC  
CATCTTCACACAGTATATCCGCACAAAGAAGCGCTGCAGTTTCAAGGCGGCAGCGATGGCTG  
TGATGTTTCGCTTCAGGGCTGATGAGAAAGACTCTGAACAAGAGAGTGAAGTCCACGATCCTC  
TTCGCCTCTCAGACCGGAAAGGCAGAGACATTCTCAACTCACTGTGCGACCTCTACAAGCA  
TGCATTTCGATGCAAAGGTGGTGTGTATGGATGAGTATGACATGGCGCAACTCGACAAAGAGC  
AACTGGTTCGTCATAGTGACAAGCACTTTTGGAAACGGGGATCCCCGGACAATGGCGAGACC  
TTCGCTCGTGCTTTAATGCAAATGAAGAATCAGAATGGTCAAGCAAGTCCAAGAGACAGCCC  
ACTGAGCTCTGTGAGGTTTGGCGGTGTTCCGCTTGGATCCCGTGCCTACCCGCACTTCTGTG  
CCTTTGGCCACAGCGTGGACACCCTCCTGGAACAGCTGGGGGCTCGGCGGGTCCACGCCGTG

GGCGAAGGGGACGAACTGTGCGGCCAGGAGGAGTCATTCCGCGCATGGGCAGAGAGTGCATT  
CAAGTCTGCCTGTTTTGAGTTACGATGTTGGGCACGGTGTGACATGAACGAAGCCACTGCCA  
ATCTGCTGGGCAGCGATCTGAGTTGGGCGCCGGACAAGTTCCGACTTGTACAGGCCAAGACT  
AAGACGGACACTGACATTCTACAAGTTTTGTCCACTGTGCATCGTAAGAATATTGTGCCATG  
TACCTTCATTTCCGCGACCCAACTGCAGGCACCCGACTCAAGTCGACAAACCATCTTGGTTC  
GACTGGATACGAAGGACAACGAAGAGTTGGAGTTTACTCCCGGCGATCACCTCGGCGTCTTC  
CCGGCCAATGAAGACCACCTTGTGCAGGCGATCTTAGATAGAATCGAGGGTGAACCAAACC  
GGATGATGTGCTGGAGATAGAAGCGCTGCACAAGAAGCTGACAGCAGCTGTGGTGACGAAAA  
CGTGGATGCCTTTGAGCGCTTGCCGCCATGTTCTTTGCGCACGGCACTCTCCCGGTACCTA  
GACATCACTACCCACCATCGCCGCAGCTGTTGGGTAGTCTGTCCATGCACACCAGCGCTCC  
ATCAGAGCGAGCAGAGCTGGAGGAACTCGCTAAGGGTGGTACAAAGTACGAGAACTGGAAGT  
TCGAGCGCGCCCCTACCCTACCGGAGGTTCTGCAGGAGTACCCGTCCCTACAGGTTCCGCCC  
GCCCTGCTGCTGAGTCAGCTGCCGGTCTCCAGCAGCGCTACTACTCCATCAGCTCCTCCCC  
ACACATGTACCCGGGAGAGATCCACGCTACTTTAGCTGTGGTTCAGCTACCGTTCTCAGGGCG  
GAAAGGGTCCGGTACACAACGGCGTTTTGCTCCTCGTGGTTTAAACAGGCTTGAGGAGGGTGAA  
ACGGTCCCCTGCTTCGTCAGAGCGGCGAAGAATTTCCACCTCCCTGCCGACCCCTCCATGCC  
TGTGCTGATGGTTCGGCCCCGGTACGGGCATCGCCCCGCTGCGCAGCTTCTGGCAGCAACGCC  
AGATGGACATCAAGTCCGGTAACCATGGTGACATGACGCTGGTGTTCGGATGTGACAGTCC  
CAGATAGACCACATCTACAAGGACGAGACGGCCCAGGCCAAGACAGACGGAGCGCTGACGGA  
CATTTATACAGCCTACTCCAGAGAACC GGACACACCAAAGACCTACGTCCAGCATGTTTTGT  
ACAACCAACTCTCCGAGAGAGTAAAAGAACTCCTGAAGAATAATGGACATATCTATGTCTGT  
GGTGACGTAGCCATGGCTGATGACGTATGCACCACCGTGCAGAAAATACTGGAAGAAAAGTC  
CGCGATGACGTCGACGGAGAGCGAAGCATTAAATCAGAATGTTGAAGGACTCCAATCGCTATC  
ACGAGGACATCTTTGGGGTGACTCTCAACACAAAGGAGGTTTCGAGAGGCAGCTCGAAGCGTC  
GAGTCAGCCGAGAGCAATGCAAAATGA

**>B. lanceolatum NOSC, protein**

MEIRPNVIAVKLMKREGDGLGFLVKQRSCNPPVIVSDVVRGGAADQSGLIQVGDILLSVDGT  
SLETVPYSDALQVLRAVEVGKPTTEIILRGPEGFATKLETTFTGTGIPKTVRITTAESPLRSL  
ALSPARRLIKRITGNSHVKSIDHINAEALKEKETVSNGPLGTDHSGRTMETPKTCSSIAVQT  
SPEEPPTKEVNGQCNGNATVAQLDKTKLTLDTISIALKRESVNGNELGRPIESGPSSRRNSA  
TLSPSAKPRFARMKNWMNDKQMTDTLHNKATPINPCSGTKCLGSLMRPNAQAQKSARPAGE  
PRPKDEVLEHAKEFLDEFFASIKRANTQAHKQRWAEAKVQIEEKGWYELTQMELTYGAKLAW  
RNAPRCVGRIQWSKLQVFDARYVTTARGMYEAI CNHIKYATNKGNLRSAITIFPARTDGKHD  
FKVWNSQFVRYAGYKQPDGSVVGDPASVEFTEICQSLGWKGNPFDVLPVLSANGQDPEL  
FELSRDLVLEVELKHPKYAWFKELGMKWYALPAVANMLFDVGGVEFPAAPFSGWYMCTEIGR  
DLCDINRYNYTEQIAKRMGLDTGRASSLWRDLAMIEANVAI LHSFQTGNVTITDHHTACESF  
MKHMENEQRLRGGCPADWVWIVPPVSASLTPVFHQEMISYYLRPSY EYQEDAWKTHVWKKKE  
DTKRIMP GKAKRKFGEVAKAVKFSAKLMGKALAKRVKATILYATETGKSERYAKTVCEIF  
KHAFDAKVMCMDDYDIMHLEHETLVIVVTSTFGNGDPPDN GESFGQALLEMRHPMDNNDNR  
PPIRRVSSESSDGGHTKRLSSISSATERRRKFSHQMKERDMSMDLDGGPLSNVRFSAFGL  
GSRAYPGFCFAFAHAVDTLFGELGGERIYKMGEGDEL CGQEE SFRKWAKGVFKAACDTFCVGD  
DLNMSEASSTLLNSDATWSPDKFRLI PAEGVKEFEIWEGLSKVHHRNVVPCRLI SRENLQAP  
DSGRETILVRLDSQGSDDLNYVPGDHLAVFPANEDHLVQAVLDRLDNPDPDSIVNMEVLQE  
KQTPLGAIRTWMTSERLPPCSLRTALSRYFDITPPSPQLLQHLATQATDEEEKKELEVLGK  
GDARYEDWK FERTPNLVEVLEDYPSLVAPTLLLSQLPFLQQRYSISSSRMYPGEIHATV  
AVVRFATQGGVGP THNGVCSSWLNRIEKDDIVPCFVRGAQNFHLPEDPTVPLMMVGP GTGIA  
PFRSFQHRQMEVTS GDPHHRPKYQMTLVFGCRQSKMDDIYKHETAQAKEDGALTEVYTAL  
SREPGVPKSYVQNVI LDLIPEKVCDLLMKHNGHFYVCGDVSMAADVCNTLEKAMEKQQGMP

NKAKDFVDKDKDCNRYHEDI FGVTLRTQEVTDRVRSARKNWVRVKRLRPSTVVPTRGLSP  
VRESSLSSTPMSTPSATPVNSPYSSPLHRPDPTVCANGDLPSLHIEE

**>B. lanceolatum NosC, CDS**

ATGGAGATTTCGGCCTAACGTGATTGCCGTCAAGTTGATGAAGAGGGAGGGGGATGGACTAGG  
CTTTCTGGTGAAGCAGCGCTCCTGCAACCTCCAGTCATCGTCTCTGACGTGGTGAGAGGCG  
GGCGGCAGACCAAAGCGGGTTGATCCAAGTCGGCGACCTTATCCTCTCCGTTCGACGGCAGC  
AGTTTGGAGACCGTGCCCTACAGCGACGCTCTACAGGTTCTCAGGGCGGTGGAGGTGGGAAA  
ACCGACGGAGATCATCCTCCGCGGGCCCCGAGGGTTTTGCGACGAAGCTCGAGACCACCTTCA  
CGGGGACTGGCATCCCGAAAACGGTCCGAATAACCACTGCGGAAAAGCCCTCTGCGCTCTCTT  
GCCCTCTCGCCGGCTCGCAGGCTCATCAAGAGGATAACCGGCAACTCTCACGTCAAATCAAT  
CGACCACATCAACGCAGAAGCGCTCAAAGAGAAAAGAACTGTTTCTAATGGACCGCTAGGCA  
CTGACCACAGCGGCCGAACAATGGAGACGCCAAGACGTGTTTCGTCTATCGCTGTACAGACA  
TCACCAGAAGAGCCCCCACCAAAGAAGTCAACGGACAGTGTAAACGGCAATGCCACAGTTGC  
ACAGCTAGACAAGACAAAACCTGACTCTAGACACGATTTCTATCGCCTTGAAGAGGGAGAGCG  
TCAACGGGAATGAGCTGGGAAGGCCATCGAGTCGGGGCCGTCTTCCCGCGGGAACCTCGGCC  
ACGCTGAGCCCGTCCGCAAAACCGAGGTTTTGCCCGCATGAAGAACTGGATGAACGACAAGCA  
GATGACAGACACCCTGCACAACAAAGCTACACCGATAAAACCCCTGTTTCGGGTACAAAGTGTC  
TGGGCTCGTTGATGCGTCCTAACGCCGTGCCAGGCCAAGAGCGCCCGCCGGCTGGGGAA  
CCCAGACCGAAGGATGAAGTCTTAGAGCACGCCAAAGAGTTCCTGGACGAATTTTTTCGCGTC  
AATCAAACGCGCTAACACACAGGCACACAAGCAGAGATGGGCGGAGGCGAAGGTGCAGATCG  
AGGAGAAGGGTTGGTACGAGCTGACGCAGATGGAGCTAACGTACGGAGCCAAGCTCGCCTGG  
AGGAACGCGCCCAGATGTGTGGGCAGAATACAGTGGTCTAAACTACAGGTGTTTCGACGCTCG  
GTACGTGACTACAGCACGAGGCATGTATGAAGCCATTTGCAACCATATCAAGTATGCAACCA  
ACAAGGGAAACCTCAGGTCGGCCATCACTATCTTCCCGCTCGCACCGATGGCAAACACGAC  
TTCAAGGTGTGGAACCTCGCAGTTTGTCCGGTATGCCGGGTACAAGCAGCCGGACGGTTCCGT  
CGTTGGTGACCCAGCAAGCGTGGAGTTCCTGAGATCTGCCAGAGCCTAGGATGGAAAGGGA  
AGAACGGACCGTTTTGATGTCTGCCATGGTGCTGTCTGCTAACGGTCAGGACCCGGAGCTG  
TTTGAGCTGTCAAGGGACCTAGTGTGGAGGTGGAGCTCAAACATCCCAAATACGCGTGGTT  
CAAAGAGCTTGGAATGAAGTGGTACGCCCTGCCGGCGGTGGCTAACATGCTGTTTCGACGTGG  
GCGGAGTCGAGTTCCTGGCAGCGCCCTTCAGCGGTGGTACATGTGCACGGAGATCGGCAGA  
GACCTGTGCGACATCAACAGATACAACTACACAGAGCAAATTGCCAAAAGGATGGGGCTTGA  
TACAGGACGAGCGTCTCACTATGGAGAGACCTGGCTATGATCGAGGCAAATGTCGCCATTC  
TCCATAGCTTTTCAGACAGGCAATGTGACCATCACCGATCACACACCCGCGTGTGAGTCCTTC  
ATGAAGCACATGGAGAACGAACAGCGCCTGCGCGGTGGGTGTCCGGCGGACTGGGTCTGGAT  
CGTCCCGCCTGTCTCTGCTTCTCTCACTCCCGTCTTCCACCAGGAGATGATCAGCTACTACC  
TGAGACCGTCTTACGAATATCAGGAGGATGCGTGGAAAGACCCACGTGTGGAAAGAAGAAGGAG  
GACACCAAGAGGATCATGCCTGGGAAGGCGAAAAGAAAGTTTCGGCTTCAAGGAAGTGGCCAA  
AGCCGTGAAGTTCTCTGCAAAGCTGATGGGAAAAGCGCTGGCTAAGCGGGTGAAGGCGACCA  
TTCTGTACGCTACAGAGACCGGCAAGTCGGAGCGGTACGCCAAGACGGTCTGTGAAATCTTC  
AAGCACGCGTTTTGATGCCAAGGTGATGTGTATGGATGATTATGACATCATGCACCTGGAACA  
TGAGACACTGGTCATCGTGGTGACCAGCACTTTCGGCAACGGTGACCCACCGGACAATGGGG  
AGTCGTTTTGGCCAAGCCCTTCTGGAGATGCGACATCCACCAATGGACAACAACGACAACAGA  
CCCCCTATACGGCGGGTTTTCTGAATCAAGCAGTGACGGTGGGCACACGAAGCGGCTGAGCAG  
CATTTCCAGCAGCGCCACCGAGCGGCGCCGGAAGTTCTCGCACCGATGAAGGAGCGGGACA  
TGACAGCATGGACCTGGACGGCGGGCCCCCTCAGTAATGTCAGGTTTTTCGGCCTTTGGGCTT  
GGTTCTCGGGCCTACCCAGGATTCTGCGGTTTTGCGCATGCGGTTGACACCCTGTTTCGGTGA  
GCTGGGAGGAGAACGGATCTACAAGATGGGGGAGGGGGACGAGCTGTGCGGACAGGAGGAGT  
CCTTCGAAAGTGGGCTAAAGGCGTGTTCAGGCGGCCCTGTGATACTTTCTGTGTCCGGTGC  
GACCTAAACATGAGCGAGGCTAGCTCCACCCTGCTGAATTCGGACGCAACCTGGTCACCGGA  
CAAGTTCGACTCATTCCGGCAGAGGGCGTAAAGGAGTTTGAATCTGGGAAGGACTATCGA



AGGTGCACCATAGAAACGTGGTACCCTGCAGACTCATCTCCAGAGAAAACCTGCAAGCACCC  
GACTCTGGCCGGGAGACCATCCTGGTGAGACTAGACTCCCAGGGCTCGGACGATCTGAACTA  
TGTGCCCCGGGACCATCTCGCCGTCTTCCC GGCCAACGAGGACCACCTTGTGCAGGCCGTGC  
TGGACCGACTGGACAACGCTCCCGACCCGGACAGTATCGTCAACATGGAGGTTCTCCAAGAG  
AAGCAGACGCCGCTAGGAGCCATACGAACATGGATGACGAGCGAGAGACTGCCCCCTGCTC  
CCTCCGGACGGCCCTGTCTCGGTACTTTGACATCACGACGCCTCCATCGCCTCAGTTACTGC  
AGCATCTGGCTACACAAGCTACAGATGAGGAGGAGAAGAAAGAACTGGAGGTTTTGGGAAAG  
GGTGACGCGAGGTATGAAGACTGGAAGTTTGAGCGTACCCCGAACCTCGTAGAGGTCTTGA  
GGACTACCCGTCCCTGAAGGTGGCTCCGACCCTCTGCTGAGTCAGCTACCCTTCTGCAGC  
AGCGGTACTACTCCATCAGCTCATCACAGAGGATGTACCCGGGAGAGATCCACGCTACGGTC  
GCAGTGGTCAGTTTTGCCACTCAGGGTGGCGTGGGTCTACCCACAACGGAGTCTGCTCATC  
TTGGTTGAACCGAATCGAGAAGGATGATATCGTACCTTGTTCGTGCGGGGGGCACAAAAC  
TCCATCTGCCCGAGGACCCACGGTTCGCTGATGATGGTAGGTCCGGGGACTGGCATCGCG  
CCGTTCCGCAGCTTCTGGCAGCACAGGCAGATGGAGGTCACCTCTGGTGACCCACATCATCG  
GCCAAAGTACGGCCAGATGACGTTAGTATTCGGCTGTGCGCAGTCGAAAATGGACGACATCT  
ACAAGCACGAGACAGCACAGGCAAAGGAGGACGGCGCCTTGACTGAGGTCTACACGGCTCTG  
TCCAGGGAGCCGGGCGTACCAAAGTCGTATGTCCAGAACGTCATCTTGGACCTGATTTCCGA  
GAAGGTGTGCGACCTCCTGATGAAGCATAACGGCCATTTCTACGTCTGCGGGGACGTTTCCA  
TGGCAGCAGACGTCTGCAACACGCTGGAGAAGGCCATGGAAAAACAGCAGGGCATGACCCCC  
ACAAGGCCAAGGACTTCGTCGACAAGCTGAAGGACTGCAACCGATACCATGAGGACATCTT  
TGGGGTAACCTTGAGGACCCAGGAGGTGACTGACCGTGTGCGCTCGGCCGCGCGTAAGAACT  
GGGTGCGGGTGAAGAGACTGCGGCCAGCACGGTGGTCCC GCCACCAGAGGTCTCTCACCG  
GTACGTGAGAGCTCGTCCTTATCGTCTACGCCCATGTCCACGCCGTCCGCCACTCCCGTCAA  
CTCTCCCTACTCCTCACCGCTGCATCGACCCGATCCGACCGTGTGTGCCAACGGCGATTTAC  
CAAGTCTACACATTGAGGAATAA

### Supplementary Table S4

NOS sequences accession number used in the phylogenetic study.

| species             | NOSI     | NOSII    | NOSIII   |
|---------------------|----------|----------|----------|
| <i>Homo sapiens</i> | AAB49040 | AAB60366 | AAA36365 |

| species                              | NOSA                                                                                         | NOSB                         | NOSC                                                                                                                         |
|--------------------------------------|----------------------------------------------------------------------------------------------|------------------------------|------------------------------------------------------------------------------------------------------------------------------|
| <i>Asymmetron lucayanum</i>          | GESY01069733<br>GESY01069734<br>GESY01069736<br>GESY01069735<br>GESY01069737<br>GESY01069738 | GETC01128572<br>GETC01128573 | GETC01013682<br>GETC01013681<br>GESY01015049<br>GESY01007340<br>GESY01007341<br>GETC01000005<br>GESY01098362<br>GETC01143078 |
| <i>Branchiostoma lanceolatum</i>     | Suppl. Figure 2                                                                              | Suppl. Figure 2              | Suppl. Figure 2                                                                                                              |
| <i>Branchiostoma floridae</i>        | XP_002608547                                                                                 | XP_019636970                 | XP_002605826                                                                                                                 |
| <i>Branchiostoma belcheri</i>        | XP_019623080                                                                                 | XP_019636970                 | XP_019631555                                                                                                                 |
| <i>Ciona intestinalis</i>            | XP_009861972                                                                                 |                              |                                                                                                                              |
| <i>Ciona savignyi</i>                | ENSCSAVG00000009725                                                                          |                              |                                                                                                                              |
| <i>Strongylocentrotus purpuratus</i> | XP_003729305                                                                                 |                              |                                                                                                                              |

\**A. lucayanum* *NosC* gene coding sequence was very fragmented in short contigs. Two of these, GESY01098362 and GETC01143078, overlapped and we reconstructed a longer sequence, which was used for the phylogenetic analysis.

Supplmentary File S5

1

|                                    |             |            |             |            |            |
|------------------------------------|-------------|------------|-------------|------------|------------|
| Homo_sapiens_nNOS                  | ETGCTEYICM  | GSIMHPQHAR | RPEDVRTKGO  | LFPLAKEFID | QYYSSIKRFG |
| Homo_sapiens_iNOS                  | ILTCRSKSC   | GSIMTPLTRG | PRDKPTTPDE  | LLPQAIEFVN | QYYGSFKEAK |
| Homo_sapiens_eNOS                  | DGPCTPRRCL  | GSLVFPLOGR | PSPGPPAPEQ  | LLSQARDFIN | QYYSSIKRSG |
| Branchiostoma_floridae_NOSA        | VNPCSDGKCL  | GPLMRPRPFT | TPGYFRPKKEE | VLEQAQKFIF | EYYASLKRSD |
| Branchiostoma_floridae_NOSB        | VSPCSSGKCM  | GSIVRQREPF | PPYYKRPKEE  | VLEQAQKFID | DYYASMKKEN |
| Branchiostoma_floridae_NOSC        | VNPCSGTKCL  | GSLMRPKSGR | PAGEVRPKKEE | VLEHAKEFLD | EFFASIKRAN |
| Branchiostoma_belcheri_NOSA        | LNPCSDGRCL  | GPLMRPRPYT | APGYFRPKKEE | VLEQAQKFIF | EYYASLKRSD |
| Branchiostoma_belcheri_NOSB        | VSPCSSGKCM  | GSVVQRQPF  | PPDYKRPKEE  | VLEQAQKFID | DYYASLKKAN |
| Branchiostoma_belcheri_NOSC        | MNPCSGTKCL  | GSLMRPKSTR | PAGEVRPKKEE | VLEHAKEFLD | EFFASIKRAN |
| Branchiostoma_lanceolatum_NOSA     | LNPCNDGRCL  | GPLMRPRPFT | APGYFRPKKEE | VLEQAQKFIF | EYYASLKSSD |
| Branchiostoma_lanceolatum_NOSB     | VAPCSSGKCM  | GSVVRQREPF | PPGYKRPKEE  | VLEQAQKFID | DYYASMKKEN |
| Branchiostoma_lanceolatum_NOSC     | INPCSGTKCL  | GSLMRPKSAR | PAGEVRPKDE  | VLEHAKEFLD | EFFASIKRAN |
| Asymmetron_lucayanum_NOSA          | VTPCSHGRCV  | GSLMRPRPYT | APGYFRPKDE  | VLEQAQDFIF | DYYASLKKSS |
| Asymmetron_lucayanum_NOSB          | LNPCSTSGKCM | GSTVVRQRYF | PPQYKRPNEE  | ILEQAQKFID | DYYASMKKAN |
| Asymmetron_lucayanum_NOSC          | -NPCSGTKCL  | GSLMRPQVKR | PAGTARSKEE  | VLEHAKEFMD | DFFASIKRAN |
| Ciona_intestinalis_NOS             | INHCAPKKCN  | GSLMQPMVCD | PRDGKPSVES  | VRKLAKDFID | QYFASMKRND |
| Ciona_savignyi_NOS                 | -----       | -----      | -----       | -----      | ----KHSRND |
| Strongylocentrotus_purpuratus_NOSa | ETSKRSGSAN  | NDSVT-SPTR | QKPSMRSQDE  | KIRLAREFID | QYYAHAQRSG |

51

|                                    |            |            |            |            |            |
|------------------------------------|------------|------------|------------|------------|------------|
| Homo_sapiens_nNOS                  | SKAHMERLEE | VNKEIDTTST | YQLKDTIELY | GAKHAWRNAS | RCVGRIQWSK |
| Homo_sapiens_iNOS                  | IEEHLARVEA | VTKEIETTGT | YQLTGDELIF | ATKQAWRNAP | RCIGRIQWSN |
| Homo_sapiens_eNOS                  | SQAHEQLQEF | VEAEVAATGT | YQLRESELVF | GAKQAWRNAP | RCVGRIQWGK |
| Branchiostoma_floridae_NOSA        | AADRDRRWS  | VQVQIEEKGV | YHLTYDELAF | AAKMSWRNSP | RCIGRIQWSK |
| Branchiostoma_floridae_NOSB        | SEDHERRWRD | IQAOVAETGL | YDLEYDELLY | GAKMAWRNAP | RCIGRYQWNN |
| Branchiostoma_floridae_NOSC        | TQAHKQRWAE | AKAQIEEKGW | YELTQMELTY | GAKLAWRNAP | RCVGRIQWSK |
| Branchiostoma_belcheri_NOSA        | VADRDRRWRD | VQVQVEEKGV | YHLTYEELVY | GAKMSWRNAP | RCIGRIQWSK |
| Branchiostoma_belcheri_NOSB        | SAEHEKRWQD | IQAOVSETGL | YDLEYDELLY | GAKMAWRNAP | RCIGRYQWNN |
| Branchiostoma_belcheri_NOSC        | TQAHKQRWAE | AKSQIEEKGW | YELTQMELTY | GAKLGWRNAP | RCVGRIQWSK |
| Branchiostoma_lanceolatum_NOSA     | AGERDRRWRD | VQVQVEEKGV | YHLTYDELLY | GAKMSWRNAP | RCIGRIQWSK |
| Branchiostoma_lanceolatum_NOSB     | SAEHERRWID | IQAOVEEKGL | YDLEYDELLY | GAKMAWRNAS | RCIGRYQWNN |
| Branchiostoma_lanceolatum_NOSC     | TQAHKQRWAE | AKVQIEEKGW | YELTQMELTY | GAKLAWRNAP | RCVGRIQWSK |
| Asymmetron_lucayanum_NOSA          | ADDRDRRWAD | VQAQVEERGV | YQLTYDELVY | GAKMAWRNSP | RCIGRIQWSK |
| Asymmetron_lucayanum_NOSB          | STEHDRRWRD | IQAOVEEKGV | YDLTYDELLY | GAKMAWRNAP | RCIGRYQWNN |
| Asymmetron_lucayanum_NOSC          | TRAHKQRWAE | VEAQIEEKGL | YELTQMELTY | GAKLGWRNAP | RCVGRIQWSK |
| Ciona_intestinalis_NOS             | SEAHGARLDE | VMNSIDSTGT | YELTKNELIF | GAKTAWRNAP | RCIGRIQWNN |
| Ciona_savignyi_NOS                 | SEAHSSRLAE | VLASISSTGT | YELTKNELIF | GAKTAWRNAP | RCVGRIQWNN |
| Strongylocentrotus_purpuratus_NOSa | TVSHERRLYE | VQMSLKESGN | YHLTEAELIF | GAKSAWRNLP | QSRCRIYWNK |

101

|                                    |            |            |            |            |              |
|------------------------------------|------------|------------|------------|------------|--------------|
| Homo_sapiens_nNOS                  | LQVFDARDCT | TAHGMFNYIC | NHVKYATNKG | NLRSAITIFP | QRTDGKHDFFR  |
| Homo_sapiens_iNOS                  | LQVFDARSCS | TAREMFEHIC | RHVRYSTNNG | NIRSAITVFP | QRSDBGKHDFFR |
| Homo_sapiens_eNOS                  | LQVFDARDCR | SAQEMFTYIC | NHIKYATNRG | NIRSAITVFP | QRCPGRGDFFR  |
| Branchiostoma_floridae_NOSA        | LQLFDAREVT | TARGMFEAIC | RHVKWCTNDG | NIRSAITVFP | PRTDGRHDYK   |
| Branchiostoma_floridae_NOSB        | LQVIDHRNVK | TAKEMFDAVC | DHVRYATKDG | QMKTAISIFP | MRTDGKHDYK   |
| Branchiostoma_floridae_NOSC        | LQVFDARYVT | TARGMYEAIC | NHIKYTTNKG | NLRSAITIFP | ARTDGKHDFFR  |
| Branchiostoma_belcheri_NOSA        | LQLFDARDVT | TARGMFEAIC | RHIKWCTNNG | NIRSAITVFP | PRTDGRHDYK   |
| Branchiostoma_belcheri_NOSB        | LQVIDYRNVK | TAKEMFDAVC | DHVRYATKDG | QMKTAISIFP | MRTDGKHDWK   |
| Branchiostoma_belcheri_NOSC        | LQVFDARYVT | TARGMYEAIC | NHIKYATNKG | NIRSAITIFP | ARTDGKHDFFR  |
| Branchiostoma_lanceolatum_NOSA     | LQLFDARDVT | TARGMFEAIC | RHIKWCTNNG | NIRSAITVFP | PRTDGRHDYK   |
| Branchiostoma_lanceolatum_NOSB     | LQVIDYRNVK | TAQEMFDAAC | DHIRYATKDG | QMKTAISIFP | MRTDGKHDYK   |
| Branchiostoma_lanceolatum_NOSC     | LQVFDARYVT | TARGMYEAIC | NHIKYATNKG | NLRSAITIFP | ARTDGKHDFFR  |
| Asymmetron_lucayanum_NOSA          | LQVFDARDVT | TARGMFEAIC | RHIKWATNNG | NLRSAITVFP | PRTDGRHDYK   |
| Asymmetron_lucayanum_NOSB          | LQVLDQRHVK | TAQEMFDAVC | EHVRYATKDG | QMKTAISIFP | VRTDGKHDYK   |
| Asymmetron_lucayanum_NOSC          | LQVFDARYVT | TARGMFEAIC | NHIKYATNKG | NIRSAITIFP | ARTDGKHDFFR  |
| Ciona_intestinalis_NOS             | LHVFDCKRVT | STYEMFEAIC | SHLKYATNKG | NIRSCITFFP | PRNDVKTEFR   |
| Ciona_savignyi_NOS                 | LHVFDCKRVT | STREMFEAIC | VHLKYATNKG | NIRSCITFFP | PRNDVKTEFR   |
| Strongylocentrotus_purpuratus_NOSa | LQVFDARKVT | NSRDMFEMLC | KHLLYATNKG | NVRPAITVFP | ARNDNQTDFFR  |

151

|                                    |            |            |            |            |            |
|------------------------------------|------------|------------|------------|------------|------------|
| Homo_sapiens_nNOS                  | VWNSQLIRYA | GKQPDGSL   | GDPAVQFTE  | ICIQGWKPP  | RGRFDVPLPL |
| Homo_sapiens_iNOS                  | VWNAQLIRYA | GYQMPDGSIR | GDPAVVEFTQ | LCIDLGWKPK | YGRFDVVPLV |
| Homo_sapiens_eNOS                  | IWNSQLVRYA | GYRQDGSVR  | GDPAVVEITE | LCIQHGWTGP | NGRFDVPLPL |
| Branchiostoma_floridae_NOSA        | VWNGQFLKYA | AYQLPDGSIL | GDPINLEFTE | VCQALGWKGE | GTRFDLLPLV |
| Branchiostoma_floridae_NOSB        | FWNKYLFQYA | AYQQPDGSVI | GDPANLELTE | VCHSLGWKKG | GTPYDFLPAI |
| Branchiostoma_floridae_NOSC        | VWNSQFVRYA | GKQPDGSIV  | GDPASVEFTE | ICQSLGWKKG | NGPFDVPLV  |
| Branchiostoma_belcheri_NOSA        | VWNGQFMKYA | AYQLPDGSIL | GDPINLDFTE | VCQALGWKGA | GTRFDILPLV |
| Branchiostoma_belcheri_NOSB        | FWNKLLFQYA | GYEQPDGSVI | GDPGSLELTK | VCQSLGWKKG | GTPYDFLPAI |
| Branchiostoma_belcheri_NOSC        | VWNAQFIRYA | GKQPDGSVI  | GDPASVEFTE | ICQSLGWKKG | NGPFDVPLV  |
| Branchiostoma_lanceolatum_NOSA     | VWNGQFLKYA | AYQLPDGSIL | GDPINLEFTE | VCQALGWKGE | GTRFDLLPMV |
| Branchiostoma_lanceolatum_NOSB     | FWNKYLFQYA | GYQQPDGSVI | GDPANVELTE | VCQSLGWKKG | GTPYDFLPAI |
| Branchiostoma_lanceolatum_NOSC     | VWNSQFVRYA | GKQPDGSVV  | GDPASVEFTE | ICQSLGWKKG | NGPFDVPLV  |
| Asymmetron_lucayanum_NOSA          | VWNGQFMKYA | AYEMPDGSIL | GDPINLDFTE | VCQALGWKGA | GGYDILLPLV |
| Asymmetron_lucayanum_NOSB          | FWNNFLFRYA | GYTQPDGSVI | GDPDMVEFTE | VCQSLGWRGK | GTPYDYLPAI |
| Asymmetron_lucayanum_NOSC          | IWNAQFIRYA | GKXS-----  | -----      | -----WKGK  | NGPFDVPLPL |
| Ciona_intestinalis_NOS             | VWNSQLIRYA | CYREQDGSIV | GDPANLELTE | LCERLGWKKG | GGRFDLLPLL |
| Ciona_savignyi_NOS                 | VWNSQLIRYA | CYREQDGSIV | GDPANLELTE | LCMRLGWKKG | GGRFDLLPLL |
| Strongylocentrotus_purpuratus_NOSa | IWNSQLIGYA | GYRQPDGSVL | GDPSNLVFS  | VCRTLGWRS  | RTRFDVPLV  |

201

|                                    |            |            |            |            |           |
|------------------------------------|------------|------------|------------|------------|-----------|
| Homo_sapiens_nNOS                  | LQANGDPEL  | FQIPPELVLE | VPIRHPKFEW | FKDLGLKWYG | LPVSNMLLE |
| Homo_sapiens_iNOS                  | LQANGDPEL  | FEIPPELVLE | VAMEHPKFEW | FRELELKWYA | LPVSNMLLE |
| Homo_sapiens_eNOS                  | LQAPDEPPEL | FILPPELVLE | VPLEHPTLEW | FAALGLRWYA | LPVSNMLLE |
| Branchiostoma_floridae_NOSA        | LSANGEDPEW | FDIPRDIVME | VNITHPKYDW | FEELGIKWYC | VPVSNMLFD |
| Branchiostoma_floridae_NOSB        | VSANGEDPVI | FDWPEVPLE  | VELRHPKYDW | FEELAIKANC | IPMQDMLFD |
| Branchiostoma_floridae_NOSC        | LSANGQDPEL | FELSKDLVLE | VELKHPKYGW | FKELGMKWYA | LPVSNMLFD |
| Branchiostoma_belcheri_NOSA        | LSCNGDDPEW | FDIPKDIVME | VNITHPKYDW | FEELGIKWYC | LPVSNMLFD |
| Branchiostoma_belcheri_NOSB        | VSANGEDPVI | FDWPEVPLE  | LELRHPKHDW | FEELAIKVC  | IPMQDMLFD |
| Branchiostoma_belcheri_NOSC        | LSANGQDPEI | FELSKDLVLE | VEFKHPKYDW | FKELGIKWYA | LPVSNMLFD |
| Branchiostoma_lanceolatum_NOSA     | LSANGEDPEW | FDLPKDIVME | VNITHPKYDW | FEELGIKWYC | VPVSNMLFD |
| Branchiostoma_lanceolatum_NOSB     | VSANGEDPVI | FEWPEVPLE  | LELRHPKHDW | FEELAIKVC  | VPLODMLFD |
| Branchiostoma_lanceolatum_NOSC     | LSANGQDPEL | FELSRDLVLE | VELKHPKYAW | FKELGMKWYA | LPVSNMLFD |
| Asymmetron_lucayanum_NOSA          | LSANGEDPEW | FDIPKDIVME | VNITHPKYDW | FSELGIKWYC | VPVSNMLFD |
| Asymmetron_lucayanum_NOSB          | VSANGEDPVI | FDWPEVPLE  | LVLRHPKYDW | FEELNIKVC  | IPMQDMLFD |
| Asymmetron_lucayanum_NOSC          | LSANGQDPEL | FELSKDLVLE | VEIKHPKYEW | FKELGIWYA  | VPVSNMLFD |
| Ciona_intestinalis_NOS             | LQANGDPEL  | YELPSNLVLE | VKLRHPDQEW | LEKMNWKWYA | VPVSNIMLN |
| Ciona_savignyi_NOS                 | LQANGDPEL  | YELPANLVLE | VKLRHPDQDW | LEQMNWKWYA | VPVSNIMLD |
| Strongylocentrotus_purpuratus_NOSa | LQVNGEDPEV | FEIPPELIHE | VELAHPELRW | FMDLKLKWS  | MPSYSNLLD |

251

|                                    |            |            |            |            |            |
|------------------------------------|------------|------------|------------|------------|------------|
| Homo_sapiens_nNOS                  | IGGLEFSACP | FSGWYMGTEI | GRDYCDNSRY | NILEEVAKKM | NLDMRKTSSL |
| Homo_sapiens_iNOS                  | VGGLEFPGCP | FNGWYMGTEI | GRDFCDVQRY | NILEEVGRM  | GLETHKLASL |
| Homo_sapiens_eNOS                  | IGGLEFPAAP | FSGWYMSTEI | GRNLCDPHRY | NILEDVAVCM | DLDTTRTSSL |
| Branchiostoma_floridae_NOSA        | CGGLEFTAAP | FSGWYMGTEV | GRDLCANRL  | NITEAVGKRM | GLDVARNSL  |
| Branchiostoma_floridae_NOSB        | VGGMQFPACP | ITGWFOSTEP | VRDLDENRY  | NMTEIIAKKL | GYDTSRYNSL |
| Branchiostoma_floridae_NOSC        | VGGVEFPAAP | FSGWYMCTEI | GRDLCINRY  | NFTEQIAKRM | GLDTGRASSL |
| Branchiostoma_belcheri_NOSA        | CGGLEFTAAP | FSGWYMGTEV | GRDLCVNR   | NITEAVGKRM | GLDIARNSSL |
| Branchiostoma_belcheri_NOSB        | VGGMQFPACP | ITGWFOSTEP | VRDLDENRY  | NMTEIIAKKL | GYDTSRYNSL |
| Branchiostoma_belcheri_NOSC        | VGGVEFPAAP | FSGWYMCTEI | GRDLCVNR   | NFTEQIAKRM | GLDTGRASSL |
| Branchiostoma_lanceolatum_NOSA     | CGGLEFSAAP | FSGWYMGTEV | GRDLCENRL  | NITEAVGKRM | GLDVARNSL  |
| Branchiostoma_lanceolatum_NOSB     | VGGMQFPACP | ITGWFOSTEP | VRDLDENRY  | NMAEIIAKKL | GYDTSRYNSL |
| Branchiostoma_lanceolatum_NOSC     | VGGVEFPAAP | FSGWYMCTEI | GRDLCINRY  | NYTEQIAKRM | GLDTGRASSL |
| Asymmetron_lucayanum_NOSA          | CGGVEFSAAP | FSGWYMGTEV | GRDLCVNR   | NITETVGRM  | GLDIARNSSL |
| Asymmetron_lucayanum_NOSB          | CGGMHFPACP | ITGWFMSPE  | VRDLDENRY  | NFTEIIAKKL | GYDTSRYNSL |
| Asymmetron_lucayanum_NOSC          | VGGIEX---  | -----      | -----      | -----      | -----      |
| Ciona_intestinalis_NOS             | IGGVEFPGVP | FNGWFMGTEI | GRDLLDTARY | NLILPVAEAM | GLNTKKTASL |
| Ciona_savignyi_NOS                 | IGGVEFPVP  | FNGWFMGTEI | GRDLVDTARY | NMILPMAEAM | GLNTKKTSSL |
| Strongylocentrotus_purpuratus_NOSa | VGGIQFPACP | INERYVADI  | ANAMCAPKRY | NMLTMIAERL | GLDISCTDSL |

301

|                                    |            |             |            |             |             |
|------------------------------------|------------|-------------|------------|-------------|-------------|
| Homo_sapiens_nNOS                  | WKDQALVEIN | I AVLHSFQSD | KVTIVDHHS  | TESFIKHMEN  | EYRCRGGCPA  |
| Homo_sapiens_iNOS                  | WKDQAVVEIN | I AVLHSFQKQ | NVTIMDHHS  | AESFMKYMQN  | EYRSRGGCPA  |
| Homo_sapiens_eNOS                  | WKDKAAVEIN | I AVLHSYQLA | KVTIVDHHA  | TASFMKHLEN  | EQRKARGGCPA |
| Branchiostoma_floridae_NOSA        | WKDAVFVEVN | I AVLHSFQRN | NVTIMDHHTA | SESFMKHLEN  | EQRKRGCCPS  |
| Branchiostoma_floridae_NOSB        | WKDAAFLECH | I AVLHSFQMK | GVMTQDPYTL | TESFMKHMER  | EHRVRGGCPS  |
| Branchiostoma_floridae_NOSC        | WRDLALIEAN | I AVLHSFQTC | NVTITDHHTA | CESEFMKHLEN | EQRKRGCCPA  |
| Branchiostoma_belcheri_NOSA        | WKDAVLVEVN | I AVLHSFQRS | NATIMDHHTA | SESEFMKHLEN | EQRKRGCCPS  |
| Branchiostoma_belcheri_NOSB        | WKDAAFLEVH | I AVLHFTQMN | GVMTQDPHTL | TESFMKHMER  | EHRVRGGCPS  |
| Branchiostoma_belcheri_NOSC        | WRDLALIEAN | I AVLHSFQTC | NVTITDHHTA | CESEFMKHLEN | EQRKRGCCPA  |
| Branchiostoma_lanceolatum_NOSA     | WKDAVFVEVN | I AVLHSFQRN | NATIMDHHTA | SESEFMKHLEN | EQRKRGCCPS  |
| Branchiostoma_lanceolatum_NOSB     | WKDAAFLEVH | I AVIHSFQMK | GVMTQDPYTL | TESFMKHMER  | EHRVRGGCPS  |
| Branchiostoma_lanceolatum_NOSC     | WRDLAMIEAN | I AVLHSFQTC | NVTITDHHTA | CESEFMKHLEN | EQRKRGCCPA  |
| Asymmetron_lucayanum_NOSA          | WKDAVLVEVN | I AVLHSFQSN | NVTISDHHTA | SETFIKHLEN  | EQRKRGCCPS  |
| Asymmetron_lucayanum_NOSB          | WKDAAFLEVH | I AVLHSFQLE | GVMTQDPHTL | TESFMKHMER  | EHRVRGGCPS  |
| Asymmetron_lucayanum_NOSC          | -----      | -----       | -----      | -----       | -----       |
| Ciona_intestinalis_NOS             | WKDKAILELN | I AVLHSFQDD | NVTIMDHHTA | TESFMKHFSN  | EMKLRGGCPG  |
| Ciona_savignyi_NOS                 | WKDKAILELN | I AVLHSFQSD | NVTIMDHHTA | TESFMKHFSN  | EVKLRGGCPG  |
| Strongylocentrotus_purpuratus_NOSa | WRDRTLVEMN | I AVLHSFQOY | GVTIMDHHTS | SAEFMKFFAS  | EHEIROGCPT  |

351

|                                    |            |            |            |             |             |
|------------------------------------|------------|------------|------------|-------------|-------------|
| Homo_sapiens_nNOS                  | DVWVIVPPMS | GSITPVFHQE | MLNYRLTPSF | EYQDPWNTH   | VWKGITNG-TK |
| Homo_sapiens_iNOS                  | DWIVLWPPMS | GSITPVFHQE | MLNYVLSPFY | YYQVEAWKTH  | VWQDEKR--K  |
| Homo_sapiens_eNOS                  | DWAWIVPPIS | GSLTPVFHQE | MVNYFLSPAF | RYQDPWPKGS  | AAKG---TGI  |
| Branchiostoma_floridae_NOSA        | DWVWIVPPMS | ASLTFVFHQE | MANYHVRPSF | EYQEDAWLVH  | LWRKKPKENP  |
| Branchiostoma_floridae_NOSB        | DWVWIVPPSC | SSLTPVFHQE | MLNYHLRPAL | EYQDAGWKIH  | TWKTPPTIRT  |
| Branchiostoma_floridae_NOSC        | DWVWIVPPIS | GSLTPVFHQE | MISYYLRPSY | EYQEDAWMTH  | VWKKKEDGKA  |
| Branchiostoma_belcheri_NOSA        | DWVWIVPPMS | ASLTFVFHQE | MANYHVRPSF | EYQEDAWLVH  | LWRKKPKENP  |
| Branchiostoma_belcheri_NOSB        | DWVWIVPPSC | SSLTPVFHQE | MLNYHLRPAL | EYQAAGWTIH  | TWKTPPTIRT  |
| Branchiostoma_belcheri_NOSC        | DWVWIVPPVS | ASLTPVFHQE | MISYYLRPSY | EYQEDAWKTH  | VWKKKEDGKT  |
| Branchiostoma_lanceolatum_NOSA     | DWVWIVPPMS | ASLTFVFHQE | MANYHVRPSF | EYQEDAWLLH  | LWRKKPEENP  |
| Branchiostoma_lanceolatum_NOSB     | DWVWIVPPSC | SSLTPVFHQE | MLNYHLRPAL | EYQEAGWKIH  | TWKTPPTIRT  |
| Branchiostoma_lanceolatum_NOSC     | DWVWIVPPVS | ASLTPVFHQE | MISYYLRPSY | EYQEDAWKTH  | VWKKKEDGKA  |
| Asymmetron_lucayanum_NOSA          | DWVWIVPPMS | ASLTFVFHQE | MAYYLRPSF  | EYQDDAWLVH  | LWRKKPEENP  |
| Asymmetron_lucayanum_NOSB          | DWVWIVPPSC | SSLTPVFHQE | MLNYHLRPAL | EYQEAGWKIH  | EWKTLPTVRT  |
| Asymmetron_lucayanum_NOSC          | -----      | -----      | -----      | -----DAWKTH | VWKKKEDGKA  |
| Ciona_intestinalis_NOS             | DWVWLVPPVS | GSATPIFHQE | ILNYTLNPAC | LYQDPWHYH   | KWKDSVMKKR  |
| Ciona_savignyi_NOS                 | DWVWLVPPVS | GSATPVFHQE | ILNYTLNPSC | LYQDPDWQYY  | KWKDTVMVKKR |
| Strongylocentrotus_purpuratus_NOSa | DWRAVVSPLT | ASLTSLFHQE | TLNYQLMPTF | TVQDNPWEVP  | EWKSKLSTDR  |

401

|                                    |             |            |            |            |            |
|------------------------------------|-------------|------------|------------|------------|------------|
| Homo_sapiens_nNOS                  | RRATGFKKLA  | EAVKFSAKLM | QAMAKRVKA  | TILYATETGK | SOYAKTLCCE |
| Homo_sapiens_iNOS                  | RREIPLKLV   | KAVLFACMLM | RKTMASRVRV | TILFATETGK | SEALAWDLGA |
| Homo_sapiens_eNOS                  | TRKKTFKELV  | NAVKISASLM | GTVMAKRVKA | TILYGSETGR | AQSYAQQLGR |
| Branchiostoma_floridae_NOSA        | PRRCSLKEVA  | LAVTFAAVLM | KKALDKRVKT | TILYATETGK | SESFASSTLG |
| Branchiostoma_floridae_NOSB        | KKRCSFKAAA  | MAVMFAAGLM | RKTLNKRKVS | TILFASQTGK | AETFSHSLCD |
| Branchiostoma_floridae_NOSC        | KRKFGFKEVA  | KAVKFSAKLM | GKALAKRVKA | TILYATETGK | SERYAKTICE |
| Branchiostoma_belcheri_NOSA        | KRKYRLKEVA  | LAVTFAAVLM | KKALHKRVKT | TILYATETGK | SESFATSTLG |
| Branchiostoma_belcheri_NOSB        | KERC SFKAAA | MAVMFAAGLM | RKTLNRRVKS | TILFASQTGK | AETFSHSLCD |
| Branchiostoma_belcheri_NOSC        | KRKFGFKEVA  | KAVKFSAKLM | GKALAKRVKA | TILYATETGK | SERYAKTICE |
| Branchiostoma_lanceolatum_NOSA     | KRKYRLKEVA  | LAVTFAAVLM | KKALNKRKVT | TILYATETGK | SESFASSTLT |
| Branchiostoma_lanceolatum_NOSB     | KKRCSFKAAA  | MAVMFASGLM | RKTLNKRKVS | TILFASQTGK | AETFSNSLCD |
| Branchiostoma_lanceolatum_NOSC     | KRKFGFKEVA  | KAVKFSAKLM | GKALAKRVKA | TILYATETGK | SERYAKTICE |
| Asymmetron_lucayanum_NOSA          | TRKYRFKEVA  | LAVTFAAVLM | KKALDKRVKA | TILYATETGK | SESFASSTLG |
| Asymmetron_lucayanum_NOSB          | KERC SFKAAA | LAVLFAAGSM | RKALDKRVKT | TILFASQTGK | AETFSHSVCD |
| Asymmetron_lucayanum_NOSC          | KRKFGFKEVA  | KAVKFSAKLM | GKALAKRVKA | TILFATETGK | SERYAKTICE |
| Ciona_intestinalis_NOS             | KNKLHFKELA  | RSVLMTSRMM | TKAMANRIKA | TILYASETGK | SYAYSKSLQE |
| Ciona_savignyi_NOS                 | KNKLHFKELA  | KSMVMTSRMM | KKAMANRIKT | TILYATETGK | SYAYSLILQE |
| Strongylocentrotus_purpuratus_NOSa | LRSPG----A  | DPSRFSSRIL | RRALSGTFKA | TVLYASEFGK | SEYYAKKVEE |

451

|                                    |            |            |             |            |             |
|------------------------------------|------------|------------|-------------|------------|-------------|
| Homo_sapiens_nNOS                  | IFKHAFDAKV | MSMEEYDIVH | LEHETLVLVV  | TSTFGNGDPP | ENGEKFGCAL  |
| Homo_sapiens_iNOS                  | LFSCAFNPKV | VCMKYRLSC  | LEERLLLIVV  | TSTFGNGDCP | GNGEKLKKSLL |
| Homo_sapiens_eNOS                  | LFRKAFDPRV | LCMDEYDVVS | LEHETLVLVV  | TSTFGNGDPP | ENGE SFAAAL |
| Branchiostoma_floridae_NOSA        | IFKHAFDAKM | MCMDEYDITH | LEKEELVIVV  | TSTFGNGDPP | DNGEAFGQAL  |
| Branchiostoma_floridae_NOSB        | LYKHAFDAKV | ICMDEYDVTO | MDKEQLVIVV  | TSTFGNGDPP | DNGETFARAL  |
| Branchiostoma_floridae_NOSC        | IFKHAFDAKV | MCMDDYDIMH | LEHETLVIVV  | TSTFGNGDPP | DNGESFGQAL  |
| Branchiostoma_belcheri_NOSA        | IFKHAFDAKI | MCMDEYDITN | LEKEELVIVV  | TSTFGNGDPP | DNGEAFGQAL  |
| Branchiostoma_belcheri_NOSB        | LYKHAFHAKV | VCMDEYDMTO | LDKEQLVIVV  | TSTFGNGDPP | DNGKTFARAL  |
| Branchiostoma_belcheri_NOSC        | IFKHAFDAKV | MCMDDYDIMH | LEHETLVIVV  | TSTFGNGDPP | DNGESFGQAL  |
| Branchiostoma_lanceolatum_NOSA     | IFKHAFDAKM | MCMDEYDITN | LEKEELVIVV  | TSTFGNGDPP | DNGEAFGQAL  |
| Branchiostoma_lanceolatum_NOSB     | LYKHAFDAKV | VCMDEYDMAQ | LDKEQLVIVV  | TSTFGNGDPP | DNGETFARAL  |
| Branchiostoma_lanceolatum_NOSC     | IFKHAFDAKV | MCMDDYDIMH | LEHETLVIVV  | TSTFGNGDPP | DNGESFGQAL  |
| Asymmetron_lucayanum_NOSA          | IFKHAFDAKM | MCDDYDVTE  | LEKEDLVIIV  | TSTFGNGDPP | DNGEAFGQAL  |
| Asymmetron_lucayanum_NOSB          | LYKHAFDAKV | VCMDEYDISR | LSKEQLVVVV  | TSTFGNGDPP | DNGETFARAL  |
| Asymmetron_lucayanum_NOSC          | IFKHAFDAKV | MCMDDYDIMH | LEHETLVIVV  | TSTFGNGDPP | DNGESFGQAL  |
| Ciona_intestinalis_NOS             | IFNHAFDAKV | VPMDQYDIGN | LEYEALVLIV  | TSTFGNGDPP | ENGEYLAQAL  |
| Ciona_savignyi_NOS                 | IFNHAFDAKV | VAMDQYDIGN | LEYESMLLVV  | TSTFGNGDPP | ENGEDF--LL  |
| Strongylocentrotus_purpuratus_NOSa | TFRKAFDIRL | LRMDEYDVMN | LEHENLLLIVV | TSTLGNGEPP | SNGQEFCRYL  |

501

|                                    |             |            |            |             |             |
|------------------------------------|-------------|------------|------------|-------------|-------------|
| Homo_sapiens_nNOS                  | MEMRHPNSVQ  | EERKSVRFVS | FGLGSRAYPH | FCAFGHAVDT  | LLEELGGERI  |
| Homo_sapiens_iNOS                  | FMLKELNNK-  | -----FRYAV | FGLGSSMYPR | FCAFAHDIDQ  | KLSHLGASQL  |
| Homo_sapiens_eNOS                  | MEMSGPYNS   | PRPEQLRFV  | FGLGSRAYPH | FCAFAHAVIDT | RLEELGGERL  |
| Branchiostoma_floridae_NOSA        | LHMRHPPGSD  | GKKRSVRYGV | FALGSRAYPH | FCAFGHAIDT  | LFEELGAERI  |
| Branchiostoma_floridae_NOSB        | MQMKKQNGQT  | SPGDSVRYAV | FALGSRAYPH | FCFGHSLNT   | LLEQLGAQRV  |
| Branchiostoma_floridae_NOSC        | LEMRRHPPMDN | NDNRPVRFVS | FGLGSRAYPG | FCAFAHAVDT  | LFGEELGGERI |
| Branchiostoma_belcheri_NOSA        | LHMRHPPGND  | GKKKSVRYCV | FALGSRAYPH | FCAFGHAIDT  | LFEELGAERI  |
| Branchiostoma_belcheri_NOSB        | MQMKKQKQDT  | SPDNNVRFV  | FALGSRAYPH | FCFGHSSVDT  | LLDQLGAQRI  |
| Branchiostoma_belcheri_NOSC        | LEMRRHPPMDN | NDNRPVRFSA | FGLGSRAYPG | FCAFAHAVIDT | LLGELGGERI  |
| Branchiostoma_lanceolatum_NOSA     | LHMRHPPGSD  | KKRSVRYGV  | FALGSRAYPH | FCAFGHAIDT  | LFESLGAERI  |
| Branchiostoma_lanceolatum_NOSB     | MQMKKQNGQA  | SPRDSVRFV  | FALGSRAYPH | FCAFGHSSVDT | LLEQLGARRV  |
| Branchiostoma_lanceolatum_NOSC     | LEMRRHPPMDN | NDNRPVRFSA | FGLGSRAYPG | FCAFAHAVDT  | LFGEELGGERI |
| Asymmetron_lucayanum_NOSA          | LHMRHPPGSD  | GKKKSVRYAV | FALGSRAYPH | FCAFGHAINT  | LFEELGAERI  |
| Asymmetron_lucayanum_NOSB          | MQMKKNSGQ-  | -----VRFV  | FALGSRAYPH | FCFGHSSVDT  | LFEQLGARRV  |
| Asymmetron_lucayanum_NOSC          | LEMRRHPPTDN | NDNKA      | -----      | -----       | -----       |
| Ciona_intestinalis_NOS             | QKIVRDSKED  | QKKAQVRFV  | FGLGSRAYPH | FCAFAHAMDT  | FLGELEGERL  |
| Ciona_savignyi_NOS                 | FSFINIEHGI  | HKIKSSRFV  | FGLGSRAYPH | FCAFAHAVDT  | LLGELEGERV  |
| Strongylocentrotus_purpuratus_NOSa | MEMSDNNNR   | SPVPQLSYGV | FGLGSSIYPY | YCAFARGVDQ  | MLDSLGGDRL  |



551

|                                    |           |             |            |             |            |
|------------------------------------|-----------|-------------|------------|-------------|------------|
| Homo_sapiens_nNOS                  | LKMREGDEL | GQEEAFRTWA  | KKVFKAACDV | FCVGGDDVNI  | KANNSLISNS |
| Homo_sapiens_iNOS                  | TPMGEDEL  | GQEDAFRSWA  | VQIFKAACET | FDVRGKQHIQ  | IP--KLYTST |
| Homo_sapiens_eNOS                  | LQLGQDEL  | GQEEAFRGWA  | QAQFAACET  | FCVGEDA--K  | AAARDIFSPS |
| Branchiostoma_floridae_NOSA        | HPVGEDEL  | GQEESFRAWA  | KGAFKSACER | YDVGHVNM    | EANASLLGSS |
| Branchiostoma_floridae_NOSB        | HAVGEGDEL | GQEESFRAWA  | ESAFKSACLS | YDVGHGVDM   | EATANLLGSS |
| Branchiostoma_floridae_NOSC        | YKMGEDEL  | GQEE SFRKWA | KGVFKAACDT | FCVGDDELNMS | EASATLLNST |
| Branchiostoma_belcheri_NOSA        | HPVGEDEL  | GQEE SFRAWV | KGAFKSACER | YDVGHVNM    | EANASLLGSS |
| Branchiostoma_belcheri_NOSB        | HAVGEGDEL | GQEE SFRTWA | ESAFKSACLS | YDVGHGVDM   | EATANLLGSS |
| Branchiostoma_belcheri_NOSC        | YKMGEDEL  | GQEE SFRKWA | KGVFRAACDT | FCVGGDDLNMN | EASATLLNTT |
| Branchiostoma_lanceolatum_NOSA     | HPVGEDEL  | GQEE SFRVWV | KGAFKSACER | YDVGHVNM    | EANASLLGSS |
| Branchiostoma_lanceolatum_NOSB     | HAVGEGDEL | GQEE SFRAWA | ESAFKSACLS | YDVGHGVDM   | EATANLLGSS |
| Branchiostoma_lanceolatum_NOSC     | YKMGEDEL  | GQEE SFRKWA | KGVFKAACDT | FCVGGDDLNMS | EASSTLLNST |
| Asymmetron_lucayanum_NOSA          | HPVGEDEL  | GQEE SFRAWV | KGAFKSACER | FDVGHVNM    | EANASLLGNS |
| Asymmetron_lucayanum_NOSB          | HTVGEDEL  | GQEE SFRAWA | ESAFKSSCLS | FDVGHVDM    | EATANLLGSS |
| Asymmetron_lucayanum_NOSC          | -----P    | GHTKRLSSIS  | SSAT       | -----       | -----      |
| Ciona_intestinalis_NOS             | MEIGEGDEL | GQEE SFRVWA | QEVFTSACDT | FCLREQVNLE  | DANASLSTSK |
| Ciona_savignyi_NOS                 | KEIGEGDEM | GQEECFRNWA  | QQVFQGGNS  | FDRLLI FNLE | DANASLKSTK |
| Strongylocentrotus_purpuratus_NOSA | VGMGWGDEM | GLDETDFDAWL | TKTFQKYAWL | FFIFDYTVLS  | IFVCELILKG |

601

|                                    |            |             |             |             |            |
|------------------------------------|------------|-------------|-------------|-------------|------------|
| Homo_sapiens_nNOS                  | WKRNFRLTF  | VAEAPELTQG  | LSNVHKKRV   | AARLLSRQNL  | QSPKSSRSTI |
| Homo_sapiens_iNOS                  | WDPHRYRL-- | VQDSQPLSKA  | LSSMHAKNVF  | TMRLKSRQNL  | QSPTSSRATI |
| Homo_sapiens_eNOS                  | WKRQRYRLAQ | AEGQL--LLPG | LIHVHRRKMF  | QATIRSVENL  | QSSKSTRATI |
| Branchiostoma_floridae_NOSA        | WAPGKFRIVQ | TKGLPEVLEG  | LKSLHRRTL   | SSTVISRQTL  | QAPESGRQTC |
| Branchiostoma_floridae_NOSB        | WAPDKFRLVQ | AKSNRDLLEG  | LSTVHCKSVV  | SCSFI SRQTL | QAPDSSRQTI |
| Branchiostoma_floridae_NOSC        | WAADKFRLLP | AEGVKEIWE   | LKSVH SRNVV | PCRLI SREN  | QAPDSGRETI |
| Branchiostoma_belcheri_NOSA        | WAPGKFRIVQ | TKGLPEILEG  | LKSLHRRTV   | SSTVISRQTL  | QAPESRQTC  |
| Branchiostoma_belcheri_NOSB        | WAPDKFRLVQ | AKSNKDLLEG  | LSTVHRKNV   | PCTFISRQTL  | QAPDSSRQTI |
| Branchiostoma_belcheri_NOSC        | WSADKFRLLP | AEGVMEIWE   | LKSVH SRTVV | PCRLI SREN  | QAPDSGRETI |
| Branchiostoma_lanceolatum_NOSA     | WAPGKFRVQ  | TKGLPEILEG  | LKSLHRRTV   | SSTVISRQTL  | QAPESRQTC  |
| Branchiostoma_lanceolatum_NOSB     | WAPDKFRLVQ | AKTKTDILQ   | LSTVHRKNIV  | PCTFISRQTL  | QAPDSSRQTI |
| Branchiostoma_lanceolatum_NOSC     | WSPDKFRLLP | AEGVKEIWE   | LKSVH HRNVV | PCRLI SREN  | QAPDSGRETI |
| Asymmetron_lucayanum_NOSA          | WAPGKFHVQ  | TKGLPEILEG  | LKSLHRRTV   | SSTVISRQTL  | QAPESRQTC  |
| Asymmetron_lucayanum_NOSB          | WAPDKFRLVQ | AKGTRDLLEG  | LSTLHRKVV   | SCTFISRQTL  | QAPDSSRQTI |
| Asymmetron_lucayanum_NOSC          | -----      | -----       | -----ERRRK  | SROXISRQTL  | QAPESRQTC  |
| Ciona_intestinalis_NOS             | FERTDFRVVH | DKVQVPIKT   | LGTMRKCLS   | SCRLIRKKNL  | QSEESGRSTI |
| Ciona_savignyi_NOS                 | FDKSNFRVVS | DVQVEPV--   | -----       | -----       | ---ESKRSTI |
| Strongylocentrotus_purpuratus_NOSA | WNILDFFIIV | LIILGPKFLG  | SSRILRILRV  | LRAFRSLR--  | -----SRSTI |

651

|                                    |             |            |            |            |            |
|------------------------------------|-------------|------------|------------|------------|------------|
| Homo_sapiens_nNOS                  | FVRLHTNGSQ  | ELQYQPGDHL | GVFPNGHEDL | VNALIERLED | APPVNMVKV  |
| Homo_sapiens_iNOS                  | LVELSCEDGQ  | GLNYLPGEHL | GVCPGNQPAL | VQGILERVVD | GTPHQTVRL  |
| Homo_sapiens_eNOS                  | LVRLDITGGQE | GLQYQPGDHI | GVCPPNRPG  | VEALLSRVED | PPAPTEPVAV |
| Branchiostoma_floridae_NOSA        | LVELETHGAQ  | ELKYVPGDHV | AIFPANEDRL | VQAILDRLEK | GTNPDAVILI |
| Branchiostoma_floridae_NOSB        | LVQLDTKGNK  | ELQFTPGDHL | GVFPANEDRL | VQEILDRIEG | GTNPDDVLEI |
| Branchiostoma_floridae_NOSC        | LVRLDISQSD  | DLNYVPGDHL | AVFPANEDHL | VQAVLDRLDN | APDPDSIVNM |
| Branchiostoma_belcheri_NOSA        | LVQLETHGAH  | ELKYVPGDHV | AVFPANEDRL | VQAILDRLEK | GTNPDAVIQI |
| Branchiostoma_belcheri_NOSB        | LVQLDTKGRE  | ELKFSPGDHL | GIFPANENHL | VQRILGRIDG | GTNPDDVLEI |
| Branchiostoma_belcheri_NOSC        | LVRLDISQSD  | DLNYVPGDHL | AVFPANEDHL | VQAVLDRLDN | APDPDSIVNM |
| Branchiostoma_lanceolatum_NOSA     | LVQLETHGAQ  | ELRYVPGDHV | AVFPANEDRL | VQAILDRVEK | GTNPDAVIQI |
| Branchiostoma_lanceolatum_NOSB     | LVRLDITKNE  | ELEFTPGDHL | GVFPANEDHL | VQAILDRIEG | GTNPDDVLEI |
| Branchiostoma_lanceolatum_NOSC     | LVRLDISQSD  | DLNYVPGDHL | AVFPANEDHL | VQAVLDRLDN | APDPDSIVNM |
| Asymmetron_lucayanum_NOSA          | LVRLETHGAH  | ELRYVPGDHV | GIFPANEERL | VREILDRLEQ | GTNPDCVIQI |
| Asymmetron_lucayanum_NOSB          | LVRLDITKNE  | ELKFTPGDHL | GVFPANEDHL | VQAILDRVEG | GTNPDEVLEV |
| Asymmetron_lucayanum_NOSC          | LVRLGTHGDH  | ELRYASGDH  | GIFPANEDRL | VQEILDRMDK | GTNPDDVIQT |
| Ciona_intestinalis_NOS             | LIQLETKNCE  | NLNFQPGDHL | GIYPRNDPDL | VKELLSKIRD | ATDENTVVVL |
| Ciona_savignyi_NOS                 | LIQLEKKNSD  | VLNFPQGDHL | GIYPRNDPAL | VKALISKIRD | ATDDSTVVRL |
| Strongylocentrotus_purpuratus_NOSA | LVRLLNTKER  | GMAVQPGDHV | AFFPSNENAL | VARVLKRLDY | QKSPDAIFKL |

701

|                                    |            |            |            |            |            |
|------------------------------------|------------|------------|------------|------------|------------|
| Homo_sapiens_nNOS                  | ELLERNNTWT | DELRLPPCTI | FQAFKYLDI  | TTPPTPLQLQ | QFASLATSEK |
| Homo_sapiens_iNOS                  | EALESGSYVW | SDKRLPPCSL | SQALTYFLDI | TTPPTQLLLQ | KLAQVATEEP |
| Homo_sapiens_eNOS                  | EQLKSGSWV  | RDRPLPPCSL | RQALTFFLDI | TSPSPQLLR  | LLSTLAEPR  |
| Branchiostoma_floridae_NOSA        | EALKKSTWT  | SHNRLPPCSL | RTALSRYLDV | TTPSPQLLL  | YLAMHTSSR  |
| Branchiostoma_floridae_NOSB        | EALKKLTWV  | PFERLPPCSM | RTALSRYLDV | TTPSPQLLG  | SLAVHTGEPG |
| Branchiostoma_floridae_NOSC        | EVLEKQTSWM | TSERLPPCSL | RTALSRYFDI | TTPSPQLLQ  | HLATQATDEE |
| Branchiostoma_belcheri_NOSA        | EALKKSTWT  | PHDRLPCCSL | RTALSRYLDV | TTPSPQLLL  | YLAMHATSNR |
| Branchiostoma_belcheri_NOSB        | EALKKTVTW  | PFERLPPCSL | RTALSRYLDI | TTPSPQLLG  | SLAMHTNDIA |
| Branchiostoma_belcheri_NOSC        | EVLEKQTTWM | TSERLPPCSL | RTALSRYFDI | TTPAPQLLQ  | HLATQATDEE |
| Branchiostoma_lanceolatum_NOSA     | EALKKISWT  | PHDRLPTCSL | RTALSRYLDV | TTPSPQLLL  | YLAMHATSSR |
| Branchiostoma_lanceolatum_NOSB     | EALKKLTWV  | PFERLPPCSL | RTALSRYLDI | TTPSPQLLG  | SLSMHTSAPS |
| Branchiostoma_lanceolatum_NOSC     | EVLEKQTTWM | TSERLPPCSL | RTALSRYFDI | TTPSPQLLQ  | HLATQATDEE |
| Asymmetron_lucayanum_NOSA          | EAQEKSTWT  | THERLPPCSL | RTALSRYLDI | TTPSPQLLL  | YLAMHATSSR |
| Asymmetron_lucayanum_NOSB          | EALKKLTWV  | PFERLPPCSL | RTALSRYLDI | TTPPTPQLLG | SLSMHAAPE  |
| Asymmetron_lucayanum_NOSC          | -----E     | -----      | -----      | -----      | -----      |
| Ciona_intestinalis_NOS             | EAKKRSYWE  | EDTRLPPCTL | NMAFSRYLDI | TTPPTPQLLK | LFSECDVNEE |
| Ciona_savignyi_NOS                 | E-----YWD  | ADTRLPSCTL | TMAFSRFLDI | TTPPTPQLLK | LFSECVNEE  |
| Strongylocentrotus_purpuratus_NOSA | EKLPRETVWT | TVSRLPTCSL | RTALERYLDL | TTPPTPDFLR | LLATRADPR  |

751

|                                    |             |            |             |             |            |
|------------------------------------|-------------|------------|-------------|-------------|------------|
| Homo_sapiens_nNOS                  | EKQRLLVLSK  | GLOEYEEWKW | GKNPTIVEVL  | EEFPSIQMPA  | TLLLTQLSLL |
| Homo_sapiens_iNOS                  | ERQRLLEALCQ | -PSEYSKWK  | TNSPTFLEVL  | EEFPSLRVSA  | GFLLSQLPIL |
| Homo_sapiens_eNOS                  | EQQLEALSQ   | DPRRYEYWKW | FRCP TLLEVL | EQFPSVALPA  | PLLLTQLPLL |
| Branchiostoma_floridae_NOSA        | ERAELALGK   | GGARYEDWK  | EAAPTLPPEVL | QDYP SLQVPP | ALLLSQLPVL |
| Branchiostoma_floridae_NOSB        | ERAELLELAK  | GGTKYENWK  | ERAPTLPPEVL | QDYP SLQVPA | ALLLSQLPVL |
| Branchiostoma_floridae_NOSC        | EKKELEVLGK  | GDSRYEDWK  | ERTPNLPEVL  | EDYPSLKVAP  | TLLLSQLPFL |
| Branchiostoma_belcheri_NOSA        | ERAELQALGK  | GGLKYEDWK  | EVAPTLPPEVL | QDYP SLQVPP | ALLLSQLPVL |
| Branchiostoma_belcheri_NOSB        | ERAGLQELAK  | GGSKYEDWK  | EHAPTLPPEVL | QEFPSLTVPP  | ALLLSQLPVL |
| Branchiostoma_belcheri_NOSC        | EKKELEVLGK  | GDSRYEDWK  | ERTPNLPEVL  | EDYPSLKVAP  | TLLLSQLSFL |
| Branchiostoma_lanceolatum_NOSA     | ERAELALGK   | GGLRYEDWK  | EAAPTLPPEVL | QHYP SLQVPP | ALLLSQLPVL |
| Branchiostoma_lanceolatum_NOSB     | ERAELLELAK  | GGTKYENWK  | ERAPTLPPEVL | QEYPSLQVPP  | ALLLSQLPVL |
| Branchiostoma_lanceolatum_NOSC     | EKKELEVLGK  | GDARYEDWK  | ERTPNLPEVL  | EDYPSLKVAP  | TLLLSQLPFL |
| Asymmetron_lucayanum_NOSA          | ERTELEALGK  | GGPRYEDWK  | EVAPTLPPEVL | QDFPSLQVPP  | ALLLSQLPVL |
| Asymmetron_lucayanum_NOSB          | EMAELLEELGK | GGKKYESWK  | ERAPTLPPEVL | QNYPSLKVPP  | ALLLSQLPVL |
| Asymmetron_lucayanum_NOSC          | -----       | -----      | -----       | -----       | -----      |
| Ciona_intestinalis_NOS             | ESKRLEVLISQ | GQSEYEDWK  | LNNPNLIEVL  | NOFPSIQLEA  | ALLLKQLPLL |
| Ciona_savignyi_NOS                 | QSTALRILGQ  | GESEYEDWK  | SNNPNLPEVL  | NEFPSTQVDA  | SLLLKQLPLL |
| Strongylocentrotus_purpuratus_NOSa | DKEKLSILGA  | GCDEYEEWK  | ENWPNMAEVL  | EGYPSLKVPA  | SLLLTQLPLL |

801

|                                    |            |             |            |             |             |
|------------------------------------|------------|-------------|------------|-------------|-------------|
| Homo_sapiens_nNOS                  | QPRYYSISS  | PDMYPDEVHL  | TVAIVSYRTR | DGEGPIHGV   | CSSLNRIQA   |
| Homo_sapiens_iNOS                  | KPRFYSISS  | RDHTPTEIHL  | TVAVVYHTG  | DGQGPLHGV   | CSTWLSLKP   |
| Homo_sapiens_eNOS                  | QPRYYSVSSA | PSTHPGEIHL  | TVAVLAYRTG | DGLGPLHYGV  | CSTWLSLKP   |
| Branchiostoma_floridae_NOSA        | QQRYSISS   | PHMYPGQIHA  | TVDMVKYRTR | GGKGPEHSGV  | CSNWLNNTINI |
| Branchiostoma_floridae_NOSB        | QQRYSISS   | PHMYRGEIHA  | TLAVVSYRSQ | GGKGP IHNGV | CSSWFNRIE   |
| Branchiostoma_floridae_NOSC        | QQRYSISS   | QLMYPGEIHA  | TVAVVKFATQ | GGVGP IHNGV | CSSLNRIEK   |
| Branchiostoma_belcheri_NOSA        | QQRYSISS   | PHMYPGQIHA  | TVAVVKYRTR | GGKGP EHN   | CSNWLNNTINI |
| Branchiostoma_belcheri_NOSB        | QQALFHTAPP | PHMYPGQIHA  | TLAVVSYRTR | GGKGP THNGV | CSSLNRIE    |
| Branchiostoma_belcheri_NOSC        | QQRYSISS   | QRMFYPGEIHA | TVAVVRFATQ | GGVGP IHNGV | CSSLNRIEK   |
| Branchiostoma_lanceolatum_NOSA     | QQRYSISS   | PHMYPGQIHA  | TVAVVKYRTR | GGQGP EHS   | CSNWLNNTINI |
| Branchiostoma_lanceolatum_NOSB     | QQRYSISS   | PHMYPGEIHA  | TLAVVSYRSQ | GGKGP VHNGV | CSSWFNLEE   |
| Branchiostoma_lanceolatum_NOSC     | QQRYSISS   | QRMYPGEIHA  | TVAVVRFATQ | GGVGP THNGV | CSSLNRIEK   |
| Asymmetron_lucayanum_NOSA          | QQRYSISS   | PHMHPGEIHA  | TVAVVKYRTR | GGQGP EHR   | CSNWLNNTINI |
| Asymmetron_lucayanum_NOSB          | QQRYSISS   | PHMYPGEIHA  | TLAVVSFRAQ | GGKGP VHNGV | CSSWFNRIE   |
| Asymmetron_lucayanum_NOSC          | -----      | -----       | -----      | -----       | -----       |
| Ciona_intestinalis_NOS             | QARYYSISS  | PEIFYPGEIHC | TVSVVYHTR  | GGTGPLHGV   | CSSYLNITD   |
| Ciona_savignyi_NOS                 | QARYYSISS  | PDVYPGEIHC  | TVSVVYHTR  | GGDGPLHGV   | CSSYLNITD   |
| Strongylocentrotus_purpuratus_NOSa | RPRYFSISS  | PKQYPNEIHA  | TVAVVSYHPN | GGRGPVHYGA  | CSSWLYRAWK  |

851

|                                    |             |             |             |            |             |
|------------------------------------|-------------|-------------|-------------|------------|-------------|
| Homo_sapiens_nNOS                  | DELVPCFVRG  | APSFHLP RNP | QVPCILVGGP  | TGIAPFRSFW | QQRQFDIQHK  |
| Homo_sapiens_iNOS                  | QDPVPCFVRN  | ASAFHLPEDP  | SHPCILIGPG  | TGIAPFRSFW | QQR LHDSQHK |
| Homo_sapiens_eNOS                  | GDPVPCFIRG  | APSFRLPPDP  | SLPCILVGGP  | TGIAPFRSFW | QER LHDIKSK |
| Branchiostoma_floridae_NOSA        | NE SVPCFIRT | AKNFHLPEDP  | SLPVL MVGGP | TGIAPLRSFW | QQRQVDIKTG  |
| Branchiostoma_floridae_NOSB        | GETVPCFVRP  | AKNFHLPDDP  | SMPVL MVGGP | TGIAPLRSFW | QQRQMEIKSG  |
| Branchiostoma_floridae_NOSC        | DDIVPCFVRA  | AQNFHLPEDP  | TVPLMMVGGP  | TGIAPFRSFW | QHRQMEVTSG  |
| Branchiostoma_belcheri_NOSA        | NE SVPCFIRT | AKNFHLPEDS  | SLPVL MVGGP | TGIAPLRSFW | QQRQVDIKAG  |
| Branchiostoma_belcheri_NOSB        | GETVPCFVRT  | AKNFHLPDDP  | SVPVL MVGGP | TGIAPLRSFW | QQRQADIKSG  |
| Branchiostoma_belcheri_NOSC        | DDIVPCFVRA  | AQNFHLPEDP  | TVPLMMVGGP  | TGIAPFRSFW | QQRQMEVGS   |
| Branchiostoma_lanceolatum_NOSA     | NE SVPCFIRT | AKNFHLPENS  | SLPVL MVGGP | TGIAPLRSFW | QQRQVDIKAG  |
| Branchiostoma_lanceolatum_NOSB     | GETVPCFVRA  | AKNFHLPADP  | SMPVL MVGGP | TGIAPLRSFW | QQRQMDIKSG  |
| Branchiostoma_lanceolatum_NOSC     | DDIVPCFVRG  | AQNFHLPEDP  | TVPLMMVGGP  | TGIAPFRSFW | QHRQMEVTSG  |
| Asymmetron_lucayanum_NOSA          | GDSVPSFIRT  | AKNFHLPENP  | SLPVL MVGGP | TGIAPLRSFW | QQRQVDIKSG  |
| Asymmetron_lucayanum_NOSB          | GETVPCFVRP  | AKNFHLPDDP  | IMPVL MVGGP | TGIAPLRSFW | QQRQMDISSG  |
| Asymmetron_lucayanum_NOSC          | -----       | -----       | -----       | -----      | -----       |
| Ciona_intestinalis_NOS             | DEEVACFVRT  | APT FHLPLKD | NIP CILVGGP | TGIAPFRSFW | QQR LAEIRKG |
| Ciona_savignyi_NOS                 | EEEVPCFVRM  | APT FHLPTKE | DAP CILVGGP | TGIAPFRSFW | QHRISQIQKG  |
| Strongylocentrotus_purpuratus_NOSa | DEVIPAFVSS  | APYFHLPADT  | SVPVIMVGGP  | SGVAPFRSFW | QDRQTDLRQG  |

901

|                                    |            |             |             |             |             |
|------------------------------------|------------|-------------|-------------|-------------|-------------|
| Homo_sapiens_nNOS                  | GMCPMVLVFG | CROSKIDHIY  | REETLQAKNK  | GVFRELYTAY  | SREPDKPKKY  |
| Homo_sapiens_iNOS                  | GVGRMTLVFG | CRRPDEDHIY  | QEEMLEMAQK  | GVLHAVHTAY  | SRLPGKPKVY  |
| Homo_sapiens_eNOS                  | GLTPMTLVFG | CRCSQLDHLIY | RDEVQNAQQR  | GVFGRVLTAF  | SREPDPNPKTY |
| Branchiostoma_floridae_NOSA        | TTGDMTLVFG | CROSRLDHIY  | KEETAQARRD  | GALKDHTAL   | SREPDTTKTY  |
| Branchiostoma_floridae_NOSB        | NHGDMTLVFG | CROSQIDHIY  | KEETAQAKSD  | GALTDIHTAY  | SREPGTPKTY  |
| Branchiostoma_floridae_NOSC        | DPGQMTLVFG | CROSKMDDIY  | KHETAQAKED  | GALTEVYTAL  | SREPGVPKSY  |
| Branchiostoma_belcheri_NOSA        | SNGDMTLVFG | CROSRVDHIY  | KEETAQARRD  | GALTDIYTAL  | SREPGTNKTY  |
| Branchiostoma_belcheri_NOSB        | DHGDMMLVFG | CROSETDHIY  | REETAAQQT   | GALTDIYTAY  | SREPGRPKTY  |
| Branchiostoma_belcheri_NOSC        | DPGQMTLVFG | CROSKMDDIY  | KHETAQAKED  | GALTEVYTAL  | SREPGVPK--  |
| Branchiostoma_lanceolatum_NOSA     | TTGDMTLVFG | CROSRVDHIY  | KEETAQARRD  | GALTDLYIAL  | SREPGTTKTY  |
| Branchiostoma_lanceolatum_NOSB     | NHGDMTLVFG | CROSQIDHIY  | KETAQAKTD   | GALTDIYTAY  | SREPDTPKTY  |
| Branchiostoma_lanceolatum_NOSC     | DPGQMTLVFG | CROSKMDDIY  | KHETAQAKED  | GALTEVYTAL  | SREPGVPKSY  |
| Asymmetron_lucayanum_NOSA          | TNGDMTLVFG | CROSKLDHIY  | KEEVAQAERD  | GALSDIHTAL  | SREPGTPKMY  |
| Asymmetron_lucayanum_NOSB          | KIGDMTLVFG | CROSKMDHIY  | QEETARAKKD  | GALTDIYTAY  | SREPPTPKTY  |
| Asymmetron_lucayanum_NOSC          | -----      | -----       | -----       | -----       | -----       |
| Ciona_intestinalis_NOS             | AHCTMALLFG | CRNP NHDHLY | KQEVAAAMKE  | GAI SHAYTAF | SREK GKPKRY |
| Ciona_savignyi_NOS                 | DR-TMALLFG | CRNP QDHLIY | KDEVE TAMKQ | GAI SHAYTAF | SREEGKPKQY  |
| Strongylocentrotus_purpuratus_NOSa | EGGDMTLVYV | CRNAKED-LY  | KGETSVAKDE  | GALTAVLTGY  | SREPGKPKRY  |

951

|                                    |            |             |            |             |             |
|------------------------------------|------------|-------------|------------|-------------|-------------|
| Homo_sapiens_nNOS                  | VQDILQEQLA | ESVYRALEQG  | GHIYVCGDVT | MAADV LKAIQ | RIMTQQGKLS  |
| Homo_sapiens_iNOS                  | VQDILRQQLA | SEVLRVLKEP  | GHLYVCGDVR | MARDVAHTLK  | QLVAAKLLKN  |
| Homo_sapiens_eNOS                  | VQDILRTELA | AEVHRVLLER  | GHMFVCGDVT | MATNVLQTVQ  | RILATEGDME  |
| Branchiostoma_floridae_NOSA        | VQDIIRQQMP | RKVLDLVRDG  | GHVYVCGDVT | MATDVCETIQ  | RILVEHGGMS  |
| Branchiostoma_floridae_NOSB        | VQHVLYNQLS | EKVKELLENS  | GHIYVCGDVA | MADDVCTTVQ  | KILEEKSGMS  |
| Branchiostoma_floridae_NOSC        | VQNVILDLIP | EKVC DLLNHN | GHFYVCGDVS | MAADV CNTLE | KVMEKQQGMA  |
| Branchiostoma_belcheri_NOSA        | VQDILRERIP | RKVLDLVREG  | GHVYVCGDVT | MATDVCETVQ  | RILVKHGGMS  |
| Branchiostoma_belcheri_NOSB        | VQHILHNQLS | KRVQELLDSD  | GHIYVCGDVA | MADDVCTTVQ  | KILEENSAMT  |
| Branchiostoma_belcheri_NOSC        | --NVILDQIP | EKVC DLLKQN | GHFYVCGDVS | MAADV CNTLE | KVLEKQQGLT  |
| Branchiostoma_lanceolatum_NOSA     | VQDIIRQQIP | KKVLDLVKDG  | GHIYVCGDVT | MATDVGETVQ  | RILVEHGGMS  |
| Branchiostoma_lanceolatum_NOSB     | VQHVLYNQLS | ERVKELLKNN  | GHIYVCGDVA | MADDVCTTVQ  | KILEEKSAMT  |
| Branchiostoma_lanceolatum_NOSC     | VQNVILDLIP | EKVC DLLKHN | GHFYVCGDVS | MAADV CNTLE | KAMEKQQGMT  |
| Asymmetron_lucayanum_NOSA          | VQDILRQQIS | RKVRDLVRDG  | GHIYVCGDVT | MATDVCTAVQ  | KILEEHGGMS  |
| Asymmetron_lucayanum_NOSB          | VQHVLHNKLS | KRVQELLENN  | GHIYVCGDVA | MADDVCTTVQ  | KILEETS GMK |
| Asymmetron_lucayanum_NOSC          | VQNVILDQIP | QKVC DLLKHN | GHFYVCGDVS | MAADV CNTLE | TVMEKEGGMT  |
| Ciona_intestinalis_NOS             | VQNVIMSEIP | DFVYDIVEKK  | GHFYVCGDVT | MATEVNKTL   | KILCIKGGMT  |
| Ciona_savignyi_NOS                 | VQDVIMNDIS | EFVYDLITRN  | GHFYVCGDVT | MAAEVHRTLK  | DVLCINGGMT  |
| Strongylocentrotus_purpuratus_NOSa | VQDILKDH-P | WLVDYVLRRO  | GHIYVSGDVN | MVREVSNTIE  | GIIAQFGRVG  |

1001

|                                    |            |            |            |            |          |
|------------------------------------|------------|------------|------------|------------|----------|
| Homo_sapiens_nNOS                  | AEDAGVFISR | MRDDNRYHED | IFGVTLRTYE | VTNRLRSIEE | SKKDTIDE |
| Homo_sapiens_iNOS                  | EEQVEDYFFQ | LKSQKRYHED | IFGAVFPYEA | KKDRVA-VQP | SSLEMSA  |
| Homo_sapiens_eNOS                  | LDEAGDVIQV | LRDQQRHED  | IFGLTLRTQE | VTSRIRTFDP | PGSDTNS  |
| Branchiostoma_floridae_NOSA        | RARAEDFINT | MKDNNRYHED | IFGVTLKTHE | VENEARLVT  | SDDEDTS  |
| Branchiostoma_floridae_NOSB        | STESEAFIRN | LKDSNRYHED | IFGVTLNTKA | VREAARSVEP | ADSIANG  |
| Branchiostoma_floridae_NOSC        | PNRAKDFVDK | LKDCNRYHED | IFGVTLRTQE | VTDRVRSVRE | VGENTLI  |
| Branchiostoma_belcheri_NOSA        | AARAEDFINN | MKDNNRYHED | IFGVTLKTHE | VEDAARKFTS | VNYHFSN  |
| Branchiostoma_belcheri_NOSB        | STESEAFIRS | LKDSNRYHED | IFGVTLNTKA | VREAARNTPE | SESTANA  |
| Branchiostoma_belcheri_NOSC        | PTKAKDFVDK | MKDCNRYHED | IFGVTLRTQE | VTDRVRSLSL | SSSLSST  |
| Branchiostoma_lanceolatum_NOSA     | VARAEDFINN | MKDNNRYHED | IFGVTLKTHE | VEDAARKISL | SEENTSL  |
| Branchiostoma_lanceolatum_NOSB     | STESEALIRM | LKDSNRYHED | IFGVTLNTKE | VREAARS--- | ---VESA  |
| Branchiostoma_lanceolatum_NOSC     | PNKAKDFVDK | LKDCNRYHED | IFGVTLRTQE | VTDRVRSVRE | SSSLSST  |
| Asymmetron_lucayanum_NOSA          | AARAEDFVNN | MKDNNRYHED | IFGVTLKTHE | VQDAARKLMV | SDGDSTR  |
| Asymmetron_lucayanum_NOSB          | ADESEAFIRN | LKDSNRYHED | IFGVTLNTTE | VREAARNVEN | GESLDNG  |
| Asymmetron_lucayanum_NOSC          | AKNAKDFVDK | LKDCNRYHED | IFGVTLRTQE | VTDRVRSVRE | SSSLSST  |
| Ciona_intestinalis_NOS             | KEKAQEFINS | MKTEERYHED | IFGVTLRTYE | VNRSVRLKEK | SESLSHK  |
| Ciona_savignyi_NOS                 | PEQVEEYITA | MKSEDRYHED | IFGVTLRTYE | VNRSL----- | -----    |
| Strongylocentrotus_purpuratus_NOSa | AAEAKDFVRR | IKDEDHYHEE | MYGLTLHVSE | VMEKIRAVRI | EEKAVII  |



**Supplementary Table S6**

List of primers used for *Branchiostoma lanceolatum* Nos cloning and real time PCR experiments.

| <b>Primer name</b> | <b>Primer sequence</b> |                       | <b>PCR product length</b>      |
|--------------------|------------------------|-----------------------|--------------------------------|
| <b>Cloning</b>     |                        |                       |                                |
| <i>Nos-A</i>       | FORWARD                | CTGAAGTACGCCTACGATG   | 1076 bp                        |
|                    | REVERSE                | GATTTGACCAAACCAGCTCC  |                                |
| <i>Nos-B</i>       | FORWARD                | CGGTACAATCCAGAGAAACG  | 830 bp                         |
|                    | REVERSE                | GTTCCAGTTCCAGGGGTACG  |                                |
| <i>Nos-C</i>       | FORWARD                | TCGGCCGAACGTAATTGCCG  | 787 bp                         |
|                    | REVERSE                | CAGCCAGTTCTTCATGCGGGC |                                |
| <b>qPCR</b>        |                        |                       |                                |
| <i>Nos-A</i>       | FORWARD                | AGTACAGTCATCTCCAGAAC  | F-R1 = 221 bp<br>F-R2 = 258 bp |
|                    | REVERSE 1              | TCTTGCAGCGCTTCTATCTG  |                                |
|                    | REVERSE 2              | CGTCCATGATTTGACCAAAC  |                                |
| <i>Nos-B</i>       | REVERSE                | AGTTTACTCCCGGCGATCA   | 191 bp                         |
|                    | FORWARD                | AGAACATGGCGGCAAACGC   |                                |
| <i>Nos-C</i>       | REVERSE                | CAGGATTCTGCGGTTTGC    | 197 bp                         |
|                    | FORWARD                | GGAGCTAGCCTCGTCATG    |                                |
| L-32               | REVERSE                | GGCTTCAAGAAATTCCTCGTC | 117 bp                         |
|                    | FORWARD                | AATGAGTTTCCTCTTGCGTGA |                                |
